1 **Impaired Desynchronization of Beta Activity Underlies Memory Deficits in**  
2 **People with Parkinson's Disease**

3

4 Hayley J. MacDonald<sup>#1,3</sup>, John-Stuart Brittain<sup>2,3</sup>, Bernhard Spitzer<sup>4</sup>, Simon Hanslmayr<sup>2,3</sup>, Ned  
5 Jenkinson<sup>1,3</sup>

6

<sup>1</sup>School of Sport, Exercise and Rehabilitation Sciences

7

<sup>2</sup>School of Psychology

8

<sup>3</sup>Centre for Human Brain Health

9

University of Birmingham, Birmingham, United Kingdom

10

<sup>4</sup>Center for Adaptive Rationality, Max Planck Institute for Human Development,

11

Berlin, Germany

12

13 *#Corresponding author:*

14 Dr Hayley MacDonald

15 School of Sport, Exercise and Rehabilitation Sciences

16 The University of Birmingham, Edgbaston, Birmingham B15 2TT, United Kingdom

17 Phone: +441214147242

18 Email: h.j.macdonald@bham.ac.uk

19

20

21 *Keywords:* Parkinson's disease, episodic memory, beta desynchronization, semantic encoding

22 *Running title:* Beta desynchronization and memory deficits in Parkinson's

23        **Abstract**

24        There is a pressing need to better understand the mechanisms underpinning the increasingly  
25        recognised non-motor deficits in Parkinson’s disease. Brain activity during Parkinson’s  
26        disease is excessively synchronized within the beta range (12–30Hz). However, relatively  
27        little is known about how the abnormal beta rhythms impact on non-motor symptoms. In  
28        healthy adults, beta desynchronization is necessary for successful episodic memory  
29        formation. We investigated whether there was a direct relationship between decreased beta  
30        modulation and memory formation in Parkinson’s disease. Electroencephalography  
31        recordings were made during an established memory-encoding paradigm. Parkinson’s  
32        participants showed impaired memory strength ( $P = 0.023$ ) and reduced beta  
33        desynchronization ( $P = 0.014$ ) relative to controls. Longer disease duration was correlated  
34        with a larger reduction in beta desynchronization, and a concomitant reduction in memory  
35        performance. These novel results extend the notion that pathological beta activity is causally  
36        implicated in the motor and (lesser appreciated) non-motor deficits inherent to Parkinson’s  
37        disease.

## 38 Introduction

39 Parkinson's disease (PD) is classified as a movement disorder. However, there is growing  
40 recognition that non-motor burdens also significantly impact those suffering with the  
41 condition. Non-demented PD patients can experience cognitive difficulties, including long-  
42 term memory deficits (for a review see (Raskin, Borod, & Tweedy, 1990; Zgaljardic, Borod,  
43 Foldi, & Mattis, 2003) and specifically the ability to recall verbal memory (Cohn,  
44 Moscovitch, & Davidson, 2010; Dujardin et al., 2015; Edelstyn et al., 2015).

45 One striking feature of PD demonstrated repeatedly over the last 20 years is that the  
46 electrical activity recorded from basal ganglia (BG) networks in people with PD is  
47 excessively synchronized within the beta frequency range (12–30Hz) compared to healthy  
48 controls. Under normal circumstances beta activity is modulated with voluntary movement,  
49 where the amplitude of oscillations (power) in the beta range drops at the onset of movement  
50 and rises again at the end. It is suggested that elevated beta is associated with tonic motor  
51 state and event-related desynchronization (ERD) within BG networks “allows” movement to  
52 take place (Brittain & Brown, 2014; Joundi et al., 2013), and as such the hyper-synchronized  
53 beta state seen in PD prevents desynchronization and thus interferes with voluntary  
54 movement (Jenkinson & Brown, 2011). Indeed, therapies that reduce the hyper-synchronized  
55 activity, such as dopamine replacement therapy (Ray et al., 2008) or deep brain stimulation  
56 (Eusebio et al., 2011), also proportionately improve bradykinesia and rigidity (Ray et al.,  
57 2008). Interestingly, beta desynchronization can also occur in the absence of motor output  
58 during imagined voluntary movements (McFarland, Miner, Vaughan, & Wolpaw, 2000;  
59 Miller et al., 2010). However, to date the link between exaggerated beta activity and motor  
60 symptoms in PD remains circumstantial and correlative. It therefore remains an unresolved  
61 question as to whether pathological beta activity is causal or an epiphenomenon.

62        Given that beta activity has shown elevated coupling throughout the BG–thalamocortical  
63 circuit in PD, and that this coupling has been observed over broad areas of frontal cortex  
64 (Litvak et al., 2011), we postulated that the excessive beta seen in PD should interfere with  
65 other neural mechanisms that normally operate within these spatial and temporal domains.  
66 Identifying such beta dependent processes and demonstrating a deficit of function in PD  
67 would provide further evidence that increased beta is responsible for the motor and non-  
68 motor symptoms of the disease. Recent experimental evidence suggests a role for beta  
69 oscillations in the encoding of explicit long-term memory. Specifically, a greater amount of  
70 beta ERD occurs in the left inferior frontal cortex (IFC) during memory formation of words  
71 that are subsequently remembered compared with those that are not (Hanslmayr, Spitzer, &  
72 Bauml, 2009; Hanslmayr et al., 2011; Meconi et al., 2016; Meeuwissen, Takashima,  
73 Fernandez, & Jensen, 2011; Sederberg, Kahana, Howard, Donner, & Madsen, 2003). This  
74 relationship is especially strong if the explicit memory strategy requires semantic processing  
75 (Hanslmayr et al., 2009). Memory strategies utilizing semantic processing are examples of  
76 deep encoding; when people engage with the meaning of the words e.g. put them into the  
77 context of a sentence or make a judgment about whether they relate to living/nonliving  
78 entities. Conversely, in shallow encoding an individual only engages with the presented items  
79 on a superficial and more perceptual level, as opposed to a cognitive level ( Craik & Lockhart,  
80 1972). Examples are detecting whether a presented word contains a specific letter, or whether  
81 the first and last letters of the word are in alphabetical order (Otten, Henson, & Rugg, 2001).  
82 Unlike in deep encoding, beta ERD during shallow encoding is not predictive of memory  
83 performance (Hanslmayr et al., 2009). Furthermore, beta ERD is not seen when similar words  
84 are deeply encoded but using non-semantic strategies (Fellner, Bauml, & Hanslmayr, 2013).  
85 Therefore, it appears that beta desynchronization is specifically driven by the semantic nature  
86 of the encoding task. If the explicit motor deficits in PD are a result of increased beta

87 synchrony in motor areas of the brain, it stands-to-reason that the memory deficits may well  
88 be the result of the elevated levels of beta synchrony which prevent the encoding driven ERD  
89 required for semantic processing, and memory formation as a result thereof.

90 Employing a semantic-encoding memory task to investigate the role of pathological beta  
91 in PD has several advantages. Firstly, it removes the confound of movement during the beta  
92 desynchronization window. Therefore, if a relationship exists between behavior and beta  
93 ERD this would argue against impaired beta desynchronization seen in the motor system  
94 being an epiphenomenon that merely reflects the paucity of movement in people with PD.  
95 Secondly, semantic processing (Gabrieli, Poldrack, & Desmond, 1998) and episodic memory  
96 formation (Otten & Rugg, 2001) recruit the *left* IFC. This is important since dynamic  
97 modulation of beta has already been shown to be compromised in PD within the cortical-BG  
98 network including *right* IFC and subthalamic nucleus (STN) (Brittain et al., 2012; Swann et  
99 al., 2011; Swann et al., 2009). Given the coherent beta activity within cortico-BG circuitry  
100 (Hirschmann et al., 2011; Litvak et al., 2011) and bidirectional communication (Horschig et  
101 al., 2015; Lalo et al., 2008) within these circuits, we would predict that pathological beta  
102 would equally affect *left* IFC beta desynchronization and therefore impair episodic memory  
103 that recruits semantic encoding strategies. Intriguingly, it has been demonstrated  
104 behaviourally that PD patients do show a specific memory deficit when recollecting deep-  
105 encoded words, but no deficit in shallow-non-semantic encoding (Cohn et al., 2010). If this  
106 specific deficit can be shown to be associated with the inability to sufficiently desynchronize  
107 beta activity, it would demonstrate that impaired modulation of beta might underlie at least  
108 some of the higher cognitive symptoms associated with the disease. Finally, we have  
109 demonstrated a causal relationship between beta power desynchronization in left inferior  
110 prefrontal cortex and memory performance in young healthy adults (Hanslmayr, Matuschek,  
111 & Fellner, 2014). Elucidating a direct relationship between beta power ERD and episodic

112 memory performance in PD would therefore strongly argue for a causal role of hyper-  
113 synchronized beta oscillations in the symptoms of PD.

114 Given this background, the current study aimed to determine whether there is a direct  
115 relationship between impaired beta ERD and the long-term memory deficits observed in non-  
116 demented PD. The study design, hypotheses and analyses were pre-registered (MacDonald H,  
117 Jenkinson N, Hanslmayr S. Memory encoding and beta desynchronisation in Parkinson's  
118 disease [Internet]. 2016 Available from: <https://osf.io/vb64n/>). We recorded surface  
119 electroencephalography (EEG) during an established memory-encoding paradigm to examine  
120 beta oscillations in PD patients and healthy controls during deep-semantic and shallow-non-  
121 semantic encoding. We hypothesized that PD patients would exhibit impaired memory  
122 performance compared to healthy controls following deep-semantic encoding but that there  
123 would be no difference in memory performance between groups following shallow-non-  
124 semantic encoding. We further hypothesized that PD patients would show reduced beta ERD  
125 during deep-semantic encoding compared to healthy controls, but that there would be no  
126 difference in desynchronization between groups during shallow-non-semantic encoding.

## 127 **Results**

### 128 *Participants*

129 Twenty nine adults with PD and 34 healthy control adults with no known neurological  
130 impairment were recruited into the study from local PD community groups and research  
131 volunteer databases. This pre-registered recruitment target (see <https://osf.io/vb64n/>) was  
132 calculated to account for 10 % drop out and that some participants might be unable to  
133 adequately perform the memory task (e.g. insufficient number of remembered items) while  
134 still being sufficient to detect a large behavioural effect size (Cohn et al., 2010: Experiment  
135 1) and obtain a power of 0.9. Data for 3 control participants were removed due to not being

136 able to perform the memory task correctly, and for 1 PD participant due to a change in  
137 diagnosis. Demographic information for the remaining 31 control and 28 PD participants is  
138 provided in Table 1. Patients were at an average disease duration of  $6 \pm 4$  years (range 0.3 –  
139 14) and tested on their normal medications to avoid the confound of exacerbated motor  
140 symptoms. See Table 2 for demographic and clinical data for each individual PD participant.  
141 All participants were native English speakers, had completed education at secondary or  
142 tertiary level, had no history of dementia, had normal or corrected-to-normal vision and  
143 completed the Oxford Cognitive Screen Plus questionnaire (Demeyere et al., 2016) as an  
144 assessment of global cognitive function. The two groups did not differ with respect to age,  
145 global cognitive function, or level of education (all  $P > 0.254$ ). All results are shown as group  
146 means  $\pm$  standard error.

#### 147 *Behavioural*

##### 148 Memory strength

149 In the deep-semantic encoding blocks, participants judged whether the presented word was  
150 animate i.e. whether it referred to the property of a living entity. In the shallow-non-semantic  
151 encoding blocks, participants judged whether the first and last letters of the word were in  
152 alphabetical order. These encoding instructions have been used previously to investigate  
153 subsequent memory effects (Hanslmayr et al., 2009; Otten & Rugg, 2001). Recognition  
154 testing at the end of each block required participants to rate their confidence as to whether a  
155 word presented was one encountered during encoding, or was a new word. This recognition  
156 stage was used to calculate memory strength.

157 Normal distributions were confirmed for all behavioural data sets (all  $P > 0.423$ ). A  
158 mixed-effects repeated measures (RM) ANOVA on memory strength ( $d'$ ) revealed no main  
159 effect of Group ( $F_{1,57} = 2.494$ ,  $P = 0.120$ ) but a main effect of Encoding ( $F_{1,57} = 183.499$ ,  $P <$

160 0.001). Memory performance improved in both groups with the semantic processing strategy  
161 associated with deep encoding ( $2.524 \pm 0.105$ ) leading to greater memory strength ( $d'$ ) during  
162 recognition testing compared to shallow encoding ( $1.249 \pm 0.057$ ). There was a Group X  
163 Encoding interaction ( $F_{1,57} = 4.885$ ,  $P = 0.031$ , Fig. 1A). One-tailed post-hoc  $t$ -tests revealed  
164 no difference in memory strength between groups following shallow-non-semantic encoding  
165 ( $t_{57} = 0.130$ ,  $P = 0.500$ ) but deep-semantic encoding lead to greater memory strength in  
166 control participants ( $2.739 \pm 0.145$ ) compared to PD ( $2.309 \pm 0.153$ ;  $t_{57} = 2.042$ ,  $P = 0.023$ ).  
167 Although both groups demonstrated memory benefits from the semantic processing required  
168 during deep encoding, controls benefited to a greater degree than PD participants.

169 When controlling for age, disease duration had a specific detrimental effect on  
170 mechanisms underlying memory formation when semantic processing was required in deep  
171 encoding. A LASSO regression was run for PD participants to correlate disease duration with  
172 deep-semantic and shallow-non-semantic memory strength as well as age. Only memory  
173 strength in the deep-semantic encoding condition was significantly correlated with disease  
174 duration (Fig. 1B,  $F_{1,27} = 11.533$ ,  $P = 0.002$ , other  $P > 0.242$ ). A similar regression analysis to  
175 correlate age and memory strength in controls was not performed as the assumption of  
176 normality was violated for age.

177 Encoding reaction time and accuracy

178 Reaction times and response accuracies were recorded during the *encoding stage* when  
179 participants were responding 'yes' or 'no' with button presses in response to deep-semantic  
180 and shallow-non-semantic judgements.

181 For reaction time, a mixed-effects RM ANOVA produced a main effect of Encoding ( $F_{1,55}$   
182  $= 6.430$ ,  $P = 0.014$ ) but no effect of Group ( $F_{1,55} = 1.289$ ,  $P = 0.261$ ) or Encoding X Group  
183 interaction ( $F_{1,55} = 0.764$ ,  $P = 0.386$ ). For both groups, reaction time was faster in shallow-



184 non-semantic encoding ( $1.12 \pm 0.03$  s) compared to deep-semantic encoding ( $1.17 \pm 0.03$  s)  
185 by an average of 50 ms. Similarly, for accuracy, there was a main effect of Encoding ( $F_{1,55} =$   
186  $139.156$ ,  $P < 0.001$ ) but no effect of Group ( $F_{1,55} = 0.044$ ,  $P = 0.834$ ) or Encoding X Group  
187 interaction ( $F_{1,55} = 0.119$ ,  $P = 0.732$ ). Accuracy was higher in shallow-non-semantic encoding  
188 ( $90.9 \pm 1.0$  %) compared to deep-semantic encoding ( $75.2 \pm 1.1$  %) for both groups as  
189 expected. The lack of any main effects or interactions with group indicate the significant  
190 difference in memory strength between groups in the deep-semantic condition is therefore  
191 unlikely to be driven by perceptual differences during encoding.

## 192 *EEG*

193 All EEG analysis and presented data are from the *encoding stage*. EEG data from 1  
194 control and 2 PD participants could not be used due to technical problems or large  
195 movements from dyskinesia, leaving 30 control and 26 PD EEG data sets for analysis. In  
196 alignment with previous EEG studies, and as per our pre-registered protocol, post-stimulus  
197 beta power decreases are expected to be associated with successful memory formation in  
198 healthy (Hanslmayr et al., 2009; Hanslmayr et al., 2011) and patient populations (Meconi et  
199 al., 2016). Therefore lower beta from 12 – 20 Hz was the main frequency range of interest for  
200 all dependent measures (see <https://osf.io/vb64n/>) over 0 – 1.5s relative to stimulus onset (i.e.  
201 word presentation).

202 As hypothesised, the cluster-based permutation testing on all electrodes showed that  
203 controls demonstrated greater beta ERD during deep-semantic encoding of subsequently  
204 remembered words (Hits) compared to PD participants (cluster stat = -150.1,  $P = 0.014$ , Fig.  
205 2A & B show beta ERD for electrodes in significant cluster), however no difference between  
206 groups emerged during shallow-non-semantic encoding (cluster stat = -3.7,  $P = 0.326$ , Fig.  
207 2C & D show beta ERD for electrodes in largest cluster that did not reach significance). A

208 mixed-effects RM ANOVA on averaged beta (over 0 – 1.5 s, 12 – 20 Hz) further supported  
209 this finding by producing a significant Encoding X Group interaction ( $F_{1,54} = 6.959$ ,  $P =$   
210  $0.011$ ) that confirms the difference between groups in deep-semantic encoding ( $t_{54} = 2.910$ ,  $P$   
211  $= 0.005$ ) is significantly different to shallow-non-semantic encoding ( $t_{54} = 1.030$ ,  $P = 0.307$ ).  
212 There were no main effects of Encoding ( $F_{1,54} = 0.612$ ,  $P = 0.437$ ) or Group ( $F_{1,54} = 3.946$ ,  $P$   
213  $= 0.052$ ). Therefore, a difference in beta ERD between groups is seen only in the deep-  
214 semantic encoding condition, indicating that there is an ERD deficit in the PD group that  
215 occurs specifically during deep-semantic processing.

216 The relationship between beta ERD and the deep-semantic encoding condition is  
217 reinforced by the similar pattern of beta ERD seen during the encoding of words that were  
218 not successfully remembered (Misses). Misses in controls were associated with greater beta  
219 ERD during deep-semantic encoding when compared to PD participants (cluster stat = -54.1,  
220  $P = 0.031$ ), however no difference between groups emerged during shallow-non-semantic  
221 encoding (cluster stat = -3.8,  $P = 0.330$ ). A mixed effects RM ANOVA similarly produced  
222 main effects of Encoding ( $F_{1,54} = 5.450$ ,  $P = 0.023$ ) and Group ( $F_{1,54} = 6.155$ ,  $P = 0.016$ ) and a  
223 significant Encoding X Group interaction ( $F_{1,54} = 5.975$ ,  $P = 0.018$ ). The interaction confirms  
224 the difference between groups in deep-semantic encoding ( $t_{54} = 3.367$ ,  $P = 0.001$ ) is  
225 significantly different to shallow-non-semantic encoding ( $t_{54} = 0.919$ ,  $P = 0.362$ ). The fact  
226 that a difference in beta ERD is seen between groups during encoding of both remembered  
227 and forgotten items implies the difference is related to deep-semantic encoding in general.  
228 This overall reduced beta desynchronization may lead to reduced memory performance in PD  
229 participants.

230 Successful memory formation specifically involving deep-semantic processing was  
231 associated with greater beta ERD. Within groups, controls demonstrated greater beta ERD for  
232 subsequently remembered words during deep-semantic compared to shallow-non-semantic

233 encoding (cluster stat = -94.4,  $P = 0.012$ , Fig. 2E & F show beta ERD for electrodes in  
234 significant cluster). Interestingly at a group level, PD participants did not show significantly  
235 greater ERD in deep-semantic encoding compared to shallow-non-semantic (no significant  
236 clusters were identified), although they did show a behavioural benefit of deep-semantic  
237 encoding, albeit to a lesser extent than controls. Based on findings of left IFC beta being  
238 specifically linked to memory strength in healthy controls (Hanslmayr et al., 2009;  
239 Hanslmayr et al., 2011; Meeuwissen et al., 2011), we did an additional correlational analysis  
240 focusing on left frontal beta in PD patients. Despite no group-level effect, linear regressions  
241 illustrated that PD participants who showed greater beta ERD over left frontal electrodes also  
242 had significantly greater memory strength during deep-semantic encoding ( $P = 0.008$ ,  $R^2 =$   
243  $0.256$ , Fig. 3A) but that disease duration negatively correlated with left frontal maximum beta  
244 ERD ( $P = 0.007$ ,  $R^2 = 0.263$ , Fig. 3B). PD participants earlier in the disease who were able to  
245 achieve greater beta ERD in left frontal electrodes benefited more from deep-semantic  
246 encoding strategies of memory formation.

247 The secondary dependent measure was the subsequent-memory effect (SME) in beta  
248 power which compared power between high confidence hit (i.e. subsequently strongly  
249 remembered) and miss (i.e. subsequently forgotten) trials (Brewer, Zhao, Desmond, Glover,  
250 & Gabrieli, 1998; Hanslmayr et al., 2009; Otten et al., 2001). This categorization in the  
251 *encoding stage* depended on the participant's response in the *recognition stage* and their  
252 individualized receiver operating characteristic (ROC) curves (Hanslmayr *et al.* 2009; see  
253 Materials and Methods). The SME results broadly replicated a number of previous findings  
254 (Hanslmayr et al., 2009; Hanslmayr et al., 2011; Meconi et al., 2016) and further support the  
255 importance of beta ERD as the mechanism underlying successful memory formation through  
256 deep-semantic encoding strategies: there was a significant SME in deep-semantic encoding  
257 for controls (cluster stat = -42.2,  $P = 0.027$ , Fig. 4A & B illustrate beta ERD for electrodes in

258 significant cluster) and a SME approaching significance for PD participants (cluster stat = -  
259 22.3,  $P = 0.097$ , Fig. 4C & D illustrate beta ERD for electrodes in the largest cluster).  
260 Importantly, there was no significant SME associated with shallow-non-semantic encoding  
261 (controls: cluster stat = -2.1,  $P = 0.698$ , Fig. 4E & F illustrate beta ERD for electrodes in  
262 largest cluster that did not reach significance; PD: no clusters were identified). A mixed-  
263 effects RM ANOVA showed a main effect of Encoding ( $F_{1,54} = 24.265$ ,  $P < 0.000$ ),  
264 confirming that deep-semantic encoding produced a greater average SME ( $-6 \pm 1\%$ )  
265 compared to shallow-non-semantic encoding ( $1 \pm 0.7\%$ ). There was no main effect of Group  
266 ( $F_{1,54} = 0.007$ ,  $P = 0.935$ ) or Encoding X Group interaction ( $F_{1,54} = 0.023$ ,  $P = 0.880$ ). The  
267 lack of an interaction was expected as, although PD participants remembered fewer items  
268 than controls following deep-semantic encoding, the remembered items in both groups should  
269 be accompanied by similar electrophysiological signatures (i.e. SME) as in both cases they  
270 lead to the same behavioural outcome – that of remembering (i.e.  $d'$  above zero).

## 271 **Discussion**

272 The study confirmed our pre-registered hypotheses and produced several novel findings that  
273 provide the first evidence of impaired beta modulation being associated with a non-motor  
274 symptom of PD. PD participants showed impaired memory strength compared to healthy  
275 controls but only following deep-semantic encoding of words. This behavioural finding was  
276 mirrored by the EEG results which demonstrated that PD participants exhibited reduced beta  
277 ERD compared to healthy controls but again only during deep-semantic memory formation.  
278 Furthermore, a correlation between disease duration and an increased deficit in deep-semantic  
279 encoding suggested the neuropathology of PD has a specific detrimental effect on the  
280 mechanisms underlying deep-semantic memory formation leading to both reduced beta ERD  
281 and reduced memory strength. This is reinforced by that fact that participants with PD who

282 showed greater beta ERD over left frontal electrodes benefited to a greater extent from the  
283 deep-semantic encoding memory strategy. There were no differences between the groups in  
284 age, global cognitive function, education or perception during encoding that could explain  
285 these behavioural or EEG results. Therefore, our results appear to be specific to episodic  
286 memory formation as a result of deep-semantic processing. Overall, our findings strengthen  
287 the idea that dysfunctional beta oscillations are likely to be the cause of PD symptoms in both  
288 motor and non-motor domains.

289        Parkinson's disease did not cause impaired memory performance in general, but rather a  
290 specific deficit in deep-semantic encoding of memory. Deep-semantic encoding in the  
291 context of the current study utilized general knowledge about the word to form an abstract  
292 representation and evaluate the representation as animate or inanimate. Age-related memory  
293 decline is a widely acknowledged fact that is seen across several subdomains, including  
294 episodic memory (e.g. see (Shing et al., 2010)). Over and above the aging-related decline, a  
295 further decline in episodic memory resulting from deep-semantic encoding appeared to be  
296 caused by the mechanisms underlying PD. Replicating previous findings, PD participants  
297 were able to employ the non-semantic encoding strategy to build a memory trace of  
298 equivalent strength to controls (Cohn et al., 2010). The difference in memory performance  
299 between groups was only elucidated following a deep-semantic encoding instruction. In  
300 contrast to Cohn and colleagues (Cohn et al., 2010), the current PD participants still showed a  
301 behavioural benefit from the deep-semantic encoding memory strategy and those who were  
302 less progressed in the disease benefited to a greater degree. People with PD struggle to  
303 spontaneously implement the optimal memory encoding strategy (Knoke, Taylor, & Saint-  
304 Cyr, 1998). However with explicit encoding instructions, PD participants managed to  
305 improve memory with the optimal deep-semantic encoding strategy, albeit to a lesser degree  
306 than controls. This finding suggests they are able to recruit the neural mechanisms to process

307 semantic information about the words in the deep encoding condition, but something prevents  
308 the formation of a robust memory trace. Overall, people with PD exhibited a limited deep-  
309 semantic processing capacity during memory encoding rather than a general deficit in  
310 recognition memory.

311 The deficit in episodic memory performance following a deep-semantic encoding strategy  
312 displayed by PD participants was associated with a reduced dynamic range of beta ERD  
313 during encoding. Brain oscillations are considered one of the core neural mechanisms for  
314 storage and retrieval of long-term memories (Buzsaki & Draguhn, 2004; Fell & Axmacher,  
315 2011) and the extent of neural desynchronization is thought to relate to the degree of  
316 information stored in the brain (Hanslmayr, Staudigl, & Fellner, 2012). In the current study,  
317 the greater level of beta desynchronization for deep-semantic versus shallow-non-semantic  
318 encoding, and words that were subsequently remembered compared to those that weren't,  
319 further supports the importance of beta ERD as the mechanism underlying successful deep-  
320 semantic memory formation (Hanslmayr et al., 2009; Hanslmayr et al., 2011; Meconi et al.,  
321 2016; Meeuwissen et al., 2011; Sederberg et al., 2007). As both groups displayed similar  
322 behavioural outcomes of deep-semantic encoding (i.e.  $d'$  values above zero, although PD  
323 participants remembered fewer items than controls), it is not surprising that both groups  
324 displayed similar electrophysiological differences between high confidence hits and misses  
325 (i.e. a SME). Importantly however, overall beta ERD was significantly reduced in PD  
326 participants compared to controls during deep-semantic processing, but not for words  
327 encoded with a shallow-non-semantic strategy. This distinction implies that a reduced  
328 capacity to decrease beta power following stimulus presentation for PD participants reduced  
329 the richness of semantic information encoded in the brain and therefore weakened the  
330 memory strength, leading to fewer successfully recognized words and a lower  $d'$  value.

331 It has been proposed that the relative change in pre- to post-stimulus power is most  
332 important for memory performance, rather than absolute power levels (Klimesch,  
333 Doppelmayr, & Hanslmayr, 2006; Klimesch, Sauseng, & Gerloff, 2003). PD participants  
334 demonstrated decreases in the reactivity of their event-related beta power and therefore  
335 reduced encoding capacity. PD participants who were further progressed in the disease  
336 demonstrated further reductions in both beta reactivity and memory strength. A reduced  
337 dynamic range of BG-thalamocortical beta power in PD can therefore interfere with other  
338 neural mechanisms that operate in the beta frequency range apart from movement, including  
339 memory formation.

340 The neural changes causing episodic memory deficits in PD may be the same as those  
341 underlying motor symptoms. Memory formation recruits an extensive network of mainly left-  
342 lateralized regions for verbal material. This network includes the anterior temporal lobe for  
343 storage of conceptual representations and processing concepts at an abstract level (Jefferies &  
344 Lambon Ralph, 2006; Patterson, Nestor, & Rogers, 2007), and the IFC and temporoparietal  
345 region for strategic search and control processes that are necessary for semantic processing  
346 (Binder, Desai, Graves, & Conant, 2009; Jefferies, 2013; Jefferies & Lambon Ralph, 2006).  
347 The extent of beta ERD in left prefrontal cortex (PFC), specifically IFC, has been linked to  
348 memory performance (Hanslmayr et al., 2009; Hanslmayr et al., 2011). Function of the PFC  
349 is heavily influenced by the integrity of dopaminergic input onto frontostriatal connections.  
350 Therefore, it is not surprising that dopaminergic dysfunction seen in PD leads to impaired  
351 IFC function, observed in motor tasks that recruit the right IFC as part of the response  
352 inhibition network (Bokura, Yamaguchi, & Kobayashi, 2005; Gauggel, Rieger, & Feghoff,  
353 2004; Obeso et al., 2011; Swann et al., 2011). We have extended these findings to also show  
354 impairment during a memory task that has been shown to recruit the left IFC during deep-  
355 semantic encoding. Previous studies have highlighted the ability of BG oscillatory activity to

356 influence cortical neuronal oscillations recorded with surface EEG (Chung et al., 2018;  
357 Horschig et al., 2015). We therefore propose that the same pathological BG beta mechanism  
358 causing the motor symptoms in PD is contributing to the deficit in deep-semantic encoding of  
359 memory seen in the current study. This would imply a common neural mechanism may  
360 underlie a variety of deficits in PD that involve cortico-BG processes which operate  
361 predominantly in the beta frequency range.

362 It is a matter of speculation as to the cause of altered memory-related beta oscillations  
363 within PD. However, there are potential candidate mechanisms that could be contributing to  
364 pathological beta within the memory domain. For example, long-term potentiation (LTP) in  
365 the hippocampus is proposed as the mechanism of synaptic plasticity playing a key role in the  
366 formation of long-term memories (Bliss & Collingridge, 1993). Neural oscillations are  
367 thought to shape synaptic plasticity by providing temporal windows for neural firing  
368 (Hanslmayr, Staresina, & Bowman, 2016), so the differences in cortical beta oscillations in  
369 the current study between PD patients and healthy participants might be linked to LTP-like  
370 mechanisms. However, the direct relationship between any one form of synaptic plasticity  
371 and a specific frequency range of oscillations or a particular type of memory is still unclear  
372 and highly speculative, especially in humans and cortical regions. Intriguingly, LTP-like  
373 mechanisms that are altered in the motor areas in people with PD (Kishore, Joseph,  
374 Velayudhan, Popa, & Meunier, 2012; Lago-Rodriguez et al., 2016; Suppa et al., 2011) are  
375 also suggested to be the mechanism behind the reduced modulation (in PD) of movement-  
376 related beta that is normally seen in the sensorimotor area during repetitive practice of arm  
377 movements in healthy controls (Moisello et al., 2015; Nelson et al., 2017). Therefore, future  
378 studies could investigate whether impaired LTP-like mechanisms are linked to the reduced  
379 memory performance and reduced beta modulation seen in PD patients in the current  
380 paradigm.



381 Identifying a common neural mechanism behind the motor and non-motor symptoms of  
382 PD has implications for treatment and disease monitoring. There are currently no standard  
383 treatment options for mild memory and cognitive problems in PD (i.e. mild cognitive  
384 impairment). Applying interventions previously shown to decrease hyper-synchronized beta  
385 activity such as deep brain stimulation or dopamine replacement therapy (Eusebio et al.,  
386 2011; Ray et al., 2008) should in theory also help with memory deficits caused by the same  
387 pathology. Considering the inverse relationship demonstrated in the current study between  
388 disease progression and both memory performance and beta ERD, it is feasible that this  
389 memory paradigm could be developed as a useful surrogate to measure functional beta  
390 reactivity. As such, the paradigm could be used as a new and convenient behavioural test to  
391 monitor disease progression, with specific applications in telemedicine.

392 It is important to note that while we present findings that the neural changes causing  
393 episodic memory deficits in PD may resemble those underlying motor symptoms, we do not  
394 posit that reduced beta de-synchronisation is the sole deficit that emerges in PD. Nor, in-fact,  
395 that there is a single source of beta that homogenises symptomology across domains (Spitzer  
396 & Haegens, 2017). Instead, we extend the impact of a deficit that has been identified in the  
397 motor domain to other (cognitive) areas. This will likely explain some symptoms well, but  
398 not all, and should be a consideration when titrating medications to alleviate different aspects  
399 of motor and/or cognitive performance. It is important to make this distinction as we are not  
400 claiming that beta observed in the motor system directly influences memory encoding – but  
401 that beta in memory-relevant areas is also deficient and, while these rhythms are likely to  
402 serve a similar functional role, deficits may indeed be graded across functional areas. Hence,  
403 motor deficits and memory deficits may be differentially influenced depending on the  
404 underlying pathophysiological state.

405 There are a few limitations to the current study that should be considered. Firstly, the  
406 relationship between beta ERD and the behavioural deficit in the PD group is correlational.  
407 However, it is the more parsimonious explanation that a common underlying neurological  
408 deficit (i.e. impaired beta desynchronization) causes both motor and memory problems than  
409 two unrelated behavioural symptoms producing the same epiphenomenon in the beta system.  
410 Furthermore, evidence exists for a causal relationship between the strength of beta  
411 desynchronization in left PFC and memory performance (Hanslmayr et al., 2014) so the  
412 direct relationship shown in the current study would support a causal role of pathological beta  
413 in PD symptomology. Extending the findings from Hanslmayr and colleagues, future studies  
414 could use transcranial magnetic stimulation to modulate left prefrontal beta in people with PD  
415 and look for a causal influence on their episodic memory performance. Secondly, beta  
416 desynchronization also plays a role in memory retrieval (Dujardin, Bourriez, & Guieu, 1994;  
417 Duzel et al., 2003) and people with PD are thought to use inefficient retrieval strategies (see  
418 (Zakzanis & Freedman, 1999). However using recognition, which is one of the simplest ways  
419 to test episodic memory, greatly reduced retrieval demands in our task, e.g. compared to free  
420 or cued recall. A retrieval based explanation for our behavioural findings is therefore rather  
421 unlikely. Nevertheless, we cannot completely discount the contribution of impaired beta  
422 desynchronization during retrieval to the reduced recognition memory performance in our  
423 study. Our prior hypothesis and pre-registered protocol focused initially on memory  
424 encoding because encoding primarily recruits the IFC, while retrieval recruits parietal regions  
425 (Burgess & Gruzelier, 2000; Spitzer, Hanslmayr, Opitz, Mecklinger, & Bauml, 2009; Zion-  
426 Golumbic, Kutas, & Bentin, 2010). Due to the dopaminergic modulation of frontostriatal  
427 connections discussed previously, we expected pathological BG beta in PD would  
428 preferentially affect prefrontal cortical regions.

429 Despite displaying topographical maps in an effort to show the location of ERD  
430 differences between groups, the methods used in the current study cannot be used to form a  
431 robust conclusion about spatial differences in beta ERD. The location of beta ERD  
432 differences in deep-semantic encoding between patients and healthy participants seemed to  
433 indicate a widespread cortical deficit in beta desynchronization in PD patients, which  
434 included the left frontal region. This widespread difference is in contrast to, for example,  
435 more focal differences in beta ERD for healthy participants between deep-semantic and  
436 shallow-non-semantic encoding. However scalp-level EEG has limited spatial resolution.  
437 Subsequent studies using magnetoencephalography with a much higher spatial resolution  
438 would be needed to investigate these results further. Finally, when considering the  
439 generalizability of our results, it is worth noting that the PD patients in the current study were  
440 mild to moderately impaired in terms of disease severity. Our study therefore cannot directly  
441 speak to the relationship between memory impairments and beta oscillations in severely  
442 affected PD patients. However, our findings of an inverse relationship between disease  
443 duration and both memory performance and beta desynchronization speaks to a general  
444 characterisation that will likely extend (alongside other age-related factors) to those severely  
445 impaired patients.

#### 446 *Conclusion*

447 This study provides the first evidence of impaired beta modulation being associated with a  
448 non-motor symptom of PD. PD participants showed impaired memory strength and beta ERD  
449 compared to healthy controls during deep-semantic encoding. The neuropathology of PD  
450 seemed to have a specific detrimental effect on the mechanisms underlying episodic memory  
451 formation in a deep-semantic encoding task leading to both reduced memory strength and  
452 reduced beta ERD. We propose that the neural changes causing memory deficits in PD may  
453 be the same as those underlying motor symptoms i.e. impaired modulation of beta activity

454 within BG– thalamocortical circuitry. Importantly the decrease in beta modulation shown in  
455 our study cannot be explained away as an epiphenomenon that scales with decreased  
456 movement in PD. Our findings strengthen the idea that dysfunctional beta oscillations are  
457 causal in PD symptomology, and extend their implications to non-motor symptoms of the  
458 disease.

## 459 **Materials and Methods**

460 The study was approved by the University of Birmingham Research Ethics Committee  
461 (ERN\_09-528AP20) and written informed consent was obtained from each participant. Data  
462 collection was carried out during a single laboratory session for each participant at the  
463 University of Birmingham.

### 464 *Behavioural task*

465 Participants were seated approximately 1 m from a 19 inch computer monitor. Stimuli were  
466 presented in black text against a grey background using the Psychophysics Toolbox extension  
467 of Matlab (Brainard, 1997). The task was divided into eight blocks and each block into three  
468 stages (Fig. 5).

469 First, there was an *encoding stage*, which required either deep-semantic or shallow-non-  
470 semantic encoding of 30 words presented on the screen one at a time. All participants  
471 completed four blocks of each encoding. The order of presentation of each encoding-type was  
472 counterbalanced across participants. In the deep-semantic encoding blocks, participants  
473 judged whether the presented word was animate i.e. whether it referred to the property of a  
474 living entity. In the shallow-non-semantic encoding blocks, participants judged whether the  
475 first and last letters of the word were in alphabetical order. These encoding instructions have  
476 been used previously to investigate subsequent memory effects (Hanslmayr et al., 2009;

477 Otten & Rugg, 2001). Participants responded on each trial by pressing one of two response  
478 buttons (“yes” or “no”) on the keyboard using their index and middle finger. PD patients used  
479 fingers on their less affected hand and hand assignment was randomized (regardless of hand  
480 dominance) across healthy participants for comparison with patients. Button assignment was  
481 counterbalanced across patients and participants.

482 The encoding stimuli were taken from a pool of 240 English words, with a list of 120 per  
483 encoding condition selected from the MRC psycholinguistic database (Coltheart, 1981).  
484 Encoding lists were matched according to word frequency (10 - 93 per million), concreteness  
485 (252 - 593), imageability (452 – 615), number of syllables (1 – 4) and number of letters (3 –  
486 10). Words were randomly drawn from the first encoding list for the first four blocks, and  
487 the second list for the last four blocks. The order of encoding instructions rather than  
488 encoding lists was counterbalanced across participants. A single trial began with a fixation  
489 cross for a variable duration of between 1500 and 2000 ms, followed by word presentation  
490 for 2000 ms and ended with a question mark to prompt the participant to respond (for which  
491 they were given 2500 ms). Participants were instructed not to react during word presentation  
492 but give their response during presentation of the question mark.

493 The second stage in each block consisted of a distracter task during which 20 faces of  
494 famous and non-famous people were presented to the participant one at a time. The  
495 participant was required to rate the attractiveness of each face using a 6-point rating scale.  
496 The distracter stage was intended to prevent the participants rehearsing the word lists, and  
497 also to familiarize participants with the 6-button ratings which were to be used in the  
498 subsequent recognition stage.

499 In the final *recognition stage* of each block, the 30 previously encoded words and 15 novel  
500 stimuli words drawn from the same pool were presented to participants one at a time. The

501 order of words was randomized and participants were required to rate their confidence as to  
502 whether the word was one encountered in the *encoding stage*, or was a new word. Ratings  
503 were given using the 6-point rating scale where response options were R1: recollect, R2: very  
504 familiar, R3: familiar, R4: unsure new, R5 sure new, R6: very sure new, using buttons  
505 pressed with the index, middle and ring fingers on both hands. The assignment of the buttons  
506 was counterbalanced across participants (i.e. R1 – R6 vs R6 – R1), and participants were  
507 explicitly instructed to use the full range of confidence ratings. The list of new words was  
508 matched to encoding lists for word frequency, concreteness, imageability, number of  
509 syllables and number of letters. A trial progressed in the same order and with the same  
510 timings as during the *encoding stage*, except that the question mark and button prompts  
511 remained on-screen until the participant responded.

#### 512 *EEG recording*

513 Continuous EEG data were recorded using a 128 channel BioSemi ActiveTwo system  
514 (BioSemi) with electrodes positioned at the 128 standard equidistant BioSemi sites. Data  
515 were digitized using the BioSemi ActiView software, with a sampling rate of 1024 Hz and  
516 filtered between 0.1 and 100 Hz.

#### 517 *Behavioural data analysis*

518 Reaction times and response accuracies were recorded during the *encoding stage*.  
519 Response times were calculated from the onset of the question mark which prompted the  
520 participant to respond until button press. Accuracy was calculated as the number of correct  
521 Yes or No responses during each type of encoding expressed as a percentage of all words  
522 presented for that encoding condition. All other behavioural analysis and presented data are  
523 from the *recognition stage*. Trials in the recognition stage were grouped into high confidence  
524 hit (HH), low confidence hit (LH) and miss (M) categories, depending on the participant's

525 response and their individualized receiver operating characteristic (ROC) curves (Hanslmayr  
526 *et al.* 2009). Using ROCs enabled objective quantification of individual response biases and  
527 corrected for participants' tendencies to use single buttons of the rating scale differently (Fig.  
528 6). The primary dependent variable, memory strength ( $d'$ ), was calculated from recognition  
529 responses using the following equation.

$$d' = Z[\%Hits] - Z[\%False\ alarms]$$

530 Z scores were calculated for each individual using MATLAB (The Mathworks). Hits refer  
531 to combined HH and LH responses when a word is correctly remembered. False alarms are  
532 responses where the participant has incorrectly identified a new word as remembered.

### 533 *EEG data analysis*

534 All EEG analysis and presented data are from the *encoding stage*. Offline analysis was  
535 performed in MATLAB using the open-source FieldTrip toolbox (Oostenveld, Fries, Maris,  
536 & Schoffelen, 2011) and in-house MATLAB functions. Raw EEG data were highpass (1 Hz)  
537 and lowpass filtered (40 Hz) with finite impulse response filters, re-referenced to the average  
538 reference, down-sampled to 500 Hz and epoched into 7000 ms segments around word  
539 presentation (3000 ms pre to 4000 ms post stimulus onset) for pre-processing. Independent  
540 component analysis allowed components related to ocular artefacts to be visually identified  
541 and removed before subsequent visual inspection and manual removal of remaining artefacts.  
542 If any channels had been removed during artefact rejection (mean of 0.6 channels removed,  
543 min: 0, max: 3), sensor data were interpolated via triangulation of nearest neighbour and then  
544 finally re-referenced to the average reference.

545 The EEG recording epochs extracted from individual encoding trials were grouped into  
546 HH, LH and M categories, depending on the participant's subsequent response in the

547 *recognition stage*. Epochs were further segmented from 750 ms pre-stimulus to 2000 ms post  
548 stimulus for the time-frequency analysis. The entire power spectrum was corrected for 1/f  
549 (Podvalny et al., 2015; Voytek et al., 2015) by fitting a linear function to the log-transformed  
550 data for every time point and then subtracting the linear fit. The 2.75 s epochs were then  
551 subjected to a Morlet wavelet transformation (width of 7 cycles) as implemented in Fieldtrip  
552 to extract time-frequency characteristics at frequencies 2 – 40 Hz in steps of 1 Hz. Average  
553 power values were calculated for each trial type (HH, LH and M) and baseline corrected  
554 (relative change, baseline -750 to -250 ms). This baseline duration is common to examine  
555 beta ERD in memory paradigms (e.g. (Hanslmayr et al., 2009; Meconi et al., 2016)) and the  
556 timing avoids filter smearing from post stimulus effects into the baseline period. The primary  
557 dependent measure was beta power decrease (i.e. ERD) for words that were subsequently  
558 successfully remembered, regardless of confidence level (i.e. during successful encoding of a  
559 memory resulting in a HH or LH trial in the recognition stage). The analysis of beta ERD  
560 between and within groups included an average of 101 (min 66/max 118) trials for controls  
561 and 98 trials (min 66/max 118) for PD participants in deep-semantic encoding, and 71 trials  
562 for both controls (min 33/max 98) and PD participants (min 25/max 103) in shallow-non-  
563 semantic encoding. The secondary dependent measure was the subsequent-memory effect  
564 (SME) in beta power which compared power between HH and M trials (Brewer et al., 1998;  
565 Hanslmayr et al., 2009; Otten et al., 2001).

### 566 *Statistical analysis*

567 For memory strength ( $d'$ ), participants who had values outside 3 standard deviations of the  
568 group mean were removed using the median absolute deviation method. The Shapiro-Wilk  
569 test ensured normality before using a mixed-effects repeated-measures 2X2 analysis of  
570 variance (ANOVA) with factors Group (Controls, PD) and Encoding (Deep, Shallow) as per



571 our pre-registered protocol expecting a Group X Encoding interaction (MacDonald H,  
572 Jenkinson N, Hanslmayr S. Memory encoding and beta desynchronisation in Parkinson's  
573 disease [Internet]. 2016 Available from: <https://osf.io/vb64n/>). Post-hoc and planned  
574 comparisons were performed using *t*-tests. A least absolute shrinkage and selection operator  
575 (LASSO) regression was performed for the PD group to determine the capacity of age and/or  
576 disease duration to predict memory strength following deep-semantic and shallow-non-  
577 semantic encoding, accounting for collinearity between age and disease duration. A mixed-  
578 effects repeated-measures 2X2 ANOVA with factors Group (Controls, PD) and Encoding  
579 (Deep, Shallow) tested for differences between groups in encoding accuracy and reaction  
580 time for the two encoding conditions.

581 In alignment with previous EEG studies, and as per our pre-registered protocol, post-  
582 stimulus beta power decreases are expected to be associated with successful memory  
583 formation in healthy (Hanslmayr et al., 2009; Hanslmayr et al., 2011) and patient populations  
584 (Meconi et al., 2016). Therefore lower beta from 12 – 20 Hz was the main frequency range of  
585 interest for all dependent measures (see <https://osf.io/vb64n/>). Only negative clusters in this  
586 frequency range were expected so comparisons of scalp-wide group averaged data were  
587 subjected to one-tailed cluster-based permutation testing (2000 iterations) using the Monte-  
588 Carlo 'maxsum' method (Meconi et al., 2016), averaged over 12 – 20 Hz and 0 – 1.5 s  
589 relative to encoding stimulus onset. The time window of 0 – 1.5 s post encoding stimulus was  
590 chosen based on findings from previous studies investigating beta ERD using the same or similar  
591 memory paradigm (Hanslmayr et al., 2009; Meconi et al., 2016) and to avoid capturing any  
592 motor-related beta activity prior to the cue for a motor response (Pfurtscheller & Lopes da  
593 Silva, 1999) which appeared at the end of the encoding period (2 s after encoding stimulus).  
594 Data from all 128 electrodes are included in all EEG analyses. The only exception is for the  
595 additional correlational analyses in PD patients to further investigate the effect of encoding

596 on their beta ERD at an individual level, when a subset of only left frontal electrodes was  
597 used based on a literature-driven prior hypothesis (Hanslmayr et al., 2009; Hanslmayr et al.,  
598 2011; Meeuwissen et al., 2011). This subset consisted of the front left quadrant taken from  
599 left sagittal to vertex (D23 – A1 on BioSemi cap), and vertex down to mid frontal (A1 –  
600 C17). A 2x2 mixed-effects repeated-measures ANOVA also tested for an Encoding (Shallow,  
601 Deep) X Group (Controls, PD) interaction of beta ERD and SME averaged for each  
602 participant over 0 – 1.5 s, 12 – 20 Hz and significant cluster electrodes. Linear regression  
603 tested for a relationship between each PD individual’s maximum beta desynchronization over  
604 left frontal electrodes during deep-semantic encoding and i) memory strength and ii) disease  
605 duration.

606 The criterion for all statistical significance was  $\alpha = 0.05$ . Greenhouse-Geisser P values are  
607 reported for non-spherical data.

#### 608 *Data availability*

609 Anonymized data, not published in the article, will be shared on reasonable request from a  
610 qualified investigator.

#### 611 **Acknowledgements**

612 We thank Federica Meconi, Danying Wang and Sophie Watson for assistance with data  
613 collection.

#### 614 **Funding**

615 H.J.M is supported by a Neurological Foundation of New Zealand Philip Wrightson  
616 Postdoctoral Fellowship. J.B. is supported by the Medical Research Council  
617 (MR/N003446/2). S.H. is supported by a Consolidator grant from the ERC (Grant #647954)

618 and is further supported by the Wolfson Society and the Royal Society. NJ receives ongoing  
619 support from Parkinson's UK.

620 **Competing interests**

621 The authors declare no competing financial interests.

622

623 **Tables**

|                             | <b>HC</b> | <b>PD</b> |
|-----------------------------|-----------|-----------|
| <b>Age (y)</b>              | 67 (9)    | 65 (6)    |
| <b>Education</b>            | 3.8 (0.4) | 3.9 (0.4) |
| <b>Gender</b>               | 13F/18M   | 8F/20M    |
| <b>Disease Duration (y)</b> | N/A       | 6 (4)     |
| <b>Handedness</b>           | 3L/28R    | 5L/23R    |
| <b>OCS-Plus</b>             | 9.7 (0.5) | 9.7 (0.5) |

624 **Table 1. Participant demographics and global cognitive function.**

625 Values are mean (standard deviation) unless otherwise specified. HC: healthy controls; PD:

626 Parkinson's disease; OCS-Plus: Oxford Cognitive Screen Plus questionnaire (max 10).

627 Education is grouped into 1: no formal education; 2: primary school; 3: secondary school; 4:

628 tertiary level.

629

| Subject | Age<br>(year) | Gender | PD<br>Medication                                                                      | LEDD<br>(mg) | Disease Duration<br>(year) | Side<br>Most Affected |
|---------|---------------|--------|---------------------------------------------------------------------------------------|--------------|----------------------------|-----------------------|
| 1       | 61            | M      | Stalevo: 375mg levodopa<br>(5x75mg/18.75mg/200mg)<br>Ropinirole 8mg<br>Rasagiline 1mg | 759          | 11                         | R                     |
| 2       | 65            | F      | Rasagiline 1mg<br>Madopar: 800mg levodopa<br>(4x50mg/200mg)                           | 900          | 8                          | L                     |
| 3       | 76            | F      | Repinex 8mg<br>Sinemet: 500mg levodopa<br>(4x25mg/100mg, 1x25mg/100mg CR)             | 635          | 11                         | L                     |
| 4       | 68            | M      | Sinemet: 300mg levodopa<br>(3x25mg/100mg)                                             | 300          | 5                          | R                     |
| 5       | 62            | M      | Stalevo: 200mg levodopa<br>(4x50mg/12.5mg/200mg)<br>Rasagiline 1mg<br>Apomorphine 3mg | 476          | 10                         | R                     |

|                         |    |   |                 |      |    |   |
|-------------------------|----|---|-----------------|------|----|---|
| Repinex 4mg             |    |   |                 |      |    |   |
| Madopar: 200mg levodopa |    |   |                 |      |    |   |
| 6                       | 67 | M | (4x12.5mg/50mg) | 300  | 2  | L |
| Rasagiline 1mg          |    |   |                 |      |    |   |
| Madopar: 400mg levodopa |    |   |                 |      |    |   |
| 7                       | 68 | M | (4x25mg/100mg)  | 660  | 8  | L |
| Rasagiline 1mg          |    |   |                 |      |    |   |
| Repinex 8mg             |    |   |                 |      |    |   |
| Madopar: 300mg levodopa |    |   |                 |      |    |   |
| 8                       | 58 | F | (3x25mg/100mg)  | 326  | 6  | L |
| Mirapexin 0.26mg        |    |   |                 |      |    |   |
| Selegiline 5mg          |    |   |                 |      |    |   |
| Sinemet: 500mg levodopa |    |   |                 |      |    |   |
| 9                       | 72 | M | (5x25mg/100mg)  | 1090 | 13 | L |
| ReQuipXL 12mg           |    |   |                 |      |    |   |
| Amantadine 300mg        |    |   |                 |      |    |   |
| 10                      | 79 | M | Rasagiline 1mg  | 260  | 6  | R |

|    |    |   |                                             |      |    |   |
|----|----|---|---------------------------------------------|------|----|---|
|    |    |   | Ropinirole 8mg                              |      |    |   |
|    |    |   | Stalevo: 700mg levodopa                     |      |    |   |
| 11 | 74 | M | (3x200mg/50mg/200mg,<br>1x100mg/25mg/200mg) | 1711 | 14 | L |
|    |    |   | Amantadine 300mg                            |      |    |   |
|    |    |   | Rotigotine 16mg                             |      |    |   |
| 12 | 64 | M | Mirapexin 1.56mg                            | 156  | 3  | L |
|    |    |   | Rotigotine 8mg                              |      |    |   |
|    |    |   | Rasagiline 1mg                              |      |    |   |
| 13 | 67 | M | Madopar: 400mg levodopa                     | 1804 | 10 | R |
|    |    |   | (4x25mg/100mg)                              |      |    |   |
|    |    |   | Entacapone 800mg                            |      |    |   |
|    |    |   | Rasagiline 1mg                              |      |    |   |
| 14 | 67 | M | Pramipexole 2.1mg                           | 610  | 4  | R |
|    |    |   | Sinemet: 300mg levodopa                     |      |    |   |
|    |    |   | (3x25mg/100mg)                              |      |    |   |
| 15 | 61 | F | None                                        | N/A  | 3  | L |

|                         |    |   |                         |     |      |   |
|-------------------------|----|---|-------------------------|-----|------|---|
| 16                      | 59 | M | Rasagiline 1mg          | 100 | 1    | R |
| Rasagiline 1mg          |    |   |                         |     |      |   |
| Sinemet: 100mg levodopa |    |   |                         |     |      |   |
| (1x25mg/100mg)          |    |   |                         |     |      |   |
| 17                      | 56 | F | Stalevo: 250mg levodopa | 773 | 5    | L |
| (3x50mg/12.5mg/200mg    |    |   |                         |     |      |   |
| 1x100mg/25mg/200mg)     |    |   |                         |     |      |   |
| Ropinirole 12mg         |    |   |                         |     |      |   |
| Rotigotine 6mg          |    |   |                         |     |      |   |
| 18                      | 75 | M | Madopar: 500mg levodopa | 680 | 3    | L |
| (5x25mg/100mg)          |    |   |                         |     |      |   |
| 19                      | 62 | F | Sinemet: 150mg levodopa | 150 | 0.33 | L |
| (3x12.5mg/50mg)         |    |   |                         |     |      |   |
| 20                      | 58 | M | Sinemet: 150mg levodopa | 150 | 1    | L |
| (3x12.5mg/50mg)         |    |   |                         |     |      |   |
| 21                      | 70 | M | Sinemet: 400mg levodopa | 400 | 4    | L |
| (4x25mg/100mg)          |    |   |                         |     |      |   |
| 22                      | 59 | F | Ropinirole 12mg         | 640 | 7    | L |



|    |    |   |                                                                               |      |     |   |
|----|----|---|-------------------------------------------------------------------------------|------|-----|---|
|    |    |   | Sinemet: 400mg levodopa<br>(4x25mg/100mg)                                     |      |     |   |
| 23 | 69 | M | Madopar: 150mg levodopa<br>(3x12.5mg/50mg)                                    | 150  | 0.5 | L |
| 24 | 62 | M | Madopar: 700mg levodopa<br>(6x25mg/100mg, 1x25mg/100mg CR)<br>Ropinirole 16mg | 1020 | 6   | R |
| 25 | 63 | M | Requip 10mg                                                                   | 200  | 1   | L |
| 26 | 61 | F | Ropinirole 8mg<br>Madopar: 400mg levodopa<br>(8x12.5mg/50mg)                  | 560  | 4   | L |
| 27 | 54 | M | Madopar: 400mg levodopa<br>(4x25mg/100mg)<br>Selegiline 25mg                  | 650  | 1   | L |
| 28 | 73 | M | Sinemet: 400mg levodopa<br>(4x25mg/100mg)                                     | 400  | 8   | R |

**Table 2. Demographic and clinical data for Parkinson's participants.**

PD: Parkinson's disease; LEDD: levodopa equivalent daily dose; CR: continuous release.

## 630 References

- 631 Binder, J. R., Desai, R. H., Graves, W. W., & Conant, L. L. (2009). Where is the semantic system? A  
632 critical review and meta-analysis of 120 functional neuroimaging studies. *Cereb Cortex*,  
633 *19*(12), 2767-2796. doi:10.1093/cercor/bhp055
- 634 Bliss, T. V., & Collingridge, G. L. (1993). A synaptic model of memory: long-term potentiation in the  
635 hippocampus. *Nature*, *361*(6407), 31-39. doi:10.1038/361031a0
- 636 Bokura, H., Yamaguchi, S., & Kobayashi, S. (2005). Event-related potentials for response inhibition in  
637 Parkinson's disease. *Neuropsychologia*, *43*(6), 967-975.  
638 doi:10.1016/j.neuropsychologia.2004.08.010
- 639 Brainard, D. H. (1997). The Psychophysics Toolbox. *Spatial Vision*, *10*(4), 433-436.  
640 doi:10.1163/156856897X00357
- 641 Brewer, J. B., Zhao, Z., Desmond, J. E., Glover, G. H., & Gabrieli, J. D. (1998). Making memories: brain  
642 activity that predicts how well visual experience will be remembered. *Science*, *281*(5380),  
643 1185-1187.
- 644 Brittain, J. S., & Brown, P. (2014). Oscillations and the basal ganglia: motor control and beyond.  
645 *NeuroImage*, *85 Pt 2*, 637-647. doi:10.1016/j.neuroimage.2013.05.084
- 646 Brittain, J. S., Watkins, K. E., Joundi, R. A., Ray, N. J., Holland, P., Green, A. L., . . . Jenkinson, N. (2012).  
647 A role for the subthalamic nucleus in response inhibition during conflict. *J Neurosci*, *32*(39),  
648 13396-13401. doi:10.1523/JNEUROSCI.2259-12.2012
- 649 Burgess, A. P., & Gruzelier, J. H. (2000). Short duration power changes in the EEG during recognition  
650 memory for words and faces. *Psychophysiology*, *37*(5), 596-606.
- 651 Buzsaki, G., & Draguhn, A. (2004). Neuronal oscillations in cortical networks. *Science*, *304*(5679),  
652 1926-1929. doi:10.1126/science.1099745
- 653 Chung, J. W., Burciu, R. G., Ofori, E., Coombes, S. A., Christou, E. A., Okun, M. S., . . . Vaillancourt, D.  
654 E. (2018). Beta-band oscillations in the supplementary motor cortex are modulated by  
655 levodopa and associated with functional activity in the basal ganglia. *Neuroimage Clin*, *19*,  
656 559-571. doi:10.1016/j.nicl.2018.05.021
- 657 Cohn, M., Moscovitch, M., & Davidson, P. S. (2010). Double dissociation between familiarity and  
658 recollection in Parkinson's disease as a function of encoding tasks. *Neuropsychologia*, *48*(14),  
659 4142-4147. doi:10.1016/j.neuropsychologia.2010.10.013
- 660 Coltheart, M. (1981). The MRC psycholinguistic database. *Q J Exp Psychol (Hove)*, *33*, 497 - 505.
- 661 Craik, F. I. M., & Lockhart, R. S. (1972). Levels of processing: A framework for memory research.  
662 *Journal of Verbal Learning and Verbal behavior*, *11*, 671-684.
- 663 Demeyere, N., Riddoch, M. J., Slavkova, E. D., Jones, K., Reckless, I., Mathieson, P., & Humphreys, G.  
664 W. (2016). Domain-specific versus generalized cognitive screening in acute stroke. *J Neurol*,  
665 *263*(2), 306-315. doi:10.1007/s00415-015-7964-4
- 666 Dujardin, K., Bourriez, J. L., & Guieu, J. D. (1994). Event-related desynchronization (ERD) patterns  
667 during verbal memory tasks: effect of age. *Int J Psychophysiol*, *16*(1), 17-27.
- 668 Dujardin, K., Moonen, A. J., Behal, H., Defebvre, L., Duhamel, A., Duits, A. A., . . . Leentjens, A. F.  
669 (2015). Cognitive disorders in Parkinson's disease: Confirmation of a spectrum of severity.  
670 *Parkinsonism Relat Disord*. doi:10.1016/j.parkreldis.2015.08.032
- 671 Duzel, E., Habib, R., Schott, B., Schoenfeld, A., Lobaugh, N., McIntosh, A. R., . . . Heinze, H. J. (2003). A  
672 multivariate, spatiotemporal analysis of electromagnetic time-frequency data of recognition  
673 memory. *NeuroImage*, *18*(2), 185-197.
- 674 Edelstyn, N. M., John, C. M., Shepherd, T. A., Drakeford, J. L., Clark-Carter, D., Ellis, S. J., & Mayes, A.  
675 R. (2015). Evidence of an amnesia-like cued-recall memory impairment in nondementing  
676 idiopathic Parkinson's disease. *Cortex*, *71*, 85-101. doi:10.1016/j.cortex.2015.06.021
- 677 Eusebio, A., Thevathasan, W., Doyle Gaynor, L., Pogosyan, A., Bye, E., Foltynie, T., . . . Brown, P.  
678 (2011). Deep brain stimulation can suppress pathological synchronisation in parkinsonian  
679 patients. *J Neurol Neurosurg Psychiatry*, *82*(5), 569-573. doi:10.1136/jnnp.2010.217489

- 680 Fell, J., & Axmacher, N. (2011). The role of phase synchronization in memory processes. *Nat Rev*  
681 *Neurosci*, 12(2), 105-118. doi:10.1038/nrn2979
- 682 Fellner, M. C., Bauml, K. H., & Hanslmayr, S. (2013). Brain oscillatory subsequent memory effects  
683 differ in power and long-range synchronization between semantic and survival processing.  
684 *NeuroImage*, 79, 361-370. doi:10.1016/j.neuroimage.2013.04.121
- 685 Gabrieli, J. D., Poldrack, R. A., & Desmond, J. E. (1998). The role of left prefrontal cortex in language  
686 and memory. *Proc Natl Acad Sci U S A*, 95(3), 906-913.
- 687 Gauggel, S., Rieger, M., & Feghoff, T. A. (2004). Inhibition of ongoing responses in patients with  
688 Parkinson's disease. *J Neurol Neurosurg Psychiatry*, 75(4), 539-544.
- 689 Hanslmayr, S., Matuschek, J., & Fellner, M. C. (2014). Entrainment of prefrontal beta oscillations  
690 induces an endogenous echo and impairs memory formation. *Curr Biol*, 24(8), 904-909.  
691 doi:10.1016/j.cub.2014.03.007
- 692 Hanslmayr, S., Spitzer, B., & Bauml, K. H. (2009). Brain oscillations dissociate between semantic and  
693 nonsemantic encoding of episodic memories. *Cereb Cortex*, 19(7), 1631-1640.  
694 doi:10.1093/cercor/bhn197
- 695 Hanslmayr, S., Staresina, B. P., & Bowman, H. (2016). Oscillations and Episodic Memory: Addressing  
696 the Synchronization/Desynchronization Conundrum. *Trends Neurosci*, 39(1), 16-25.  
697 doi:10.1016/j.tins.2015.11.004
- 698 Hanslmayr, S., Staudigl, T., & Fellner, M. C. (2012). Oscillatory power decreases and long-term  
699 memory: the information via desynchronization hypothesis. *Front Hum Neurosci*, 6, 74.  
700 doi:10.3389/fnhum.2012.00074
- 701 Hanslmayr, S., Volberg, G., Wimber, M., Raabe, M., Greenlee, M. W., & Bauml, K. H. (2011). The  
702 relationship between brain oscillations and BOLD signal during memory formation: a  
703 combined EEG-fMRI study. *J Neurosci*, 31(44), 15674-15680. doi:10.1523/JNEUROSCI.3140-  
704 11.2011
- 705 Hirschmann, J., Ozkurt, T. E., Butz, M., Homburger, M., Elben, S., Hartmann, C. J., . . . Schnitzler, A.  
706 (2011). Distinct oscillatory STN-cortical loops revealed by simultaneous MEG and local field  
707 potential recordings in patients with Parkinson's disease. *NeuroImage*, 55(3), 1159-1168.  
708 doi:10.1016/j.neuroimage.2010.11.063
- 709 Horschig, J. M., Smolders, R., Bonnefond, M., Schoffelen, J. M., van den Munckhof, P., Schuurman, P.  
710 R., . . . Jensen, O. (2015). Directed Communication between Nucleus Accumbens and  
711 Neocortex in Humans Is Differentially Supported by Synchronization in the Theta and Alpha  
712 Band. *PLoS ONE*, 10(9), e0138685. doi:10.1371/journal.pone.0138685
- 713 Jefferies, E. (2013). The neural basis of semantic cognition: converging evidence from  
714 neuropsychology, neuroimaging and TMS. *Cortex*, 49(3), 611-625.  
715 doi:10.1016/j.cortex.2012.10.008
- 716 Jefferies, E., & Lambon Ralph, M. A. (2006). Semantic impairment in stroke aphasia versus semantic  
717 dementia: a case-series comparison. *Brain*, 129(Pt 8), 2132-2147. doi:10.1093/brain/awl153
- 718 Jenkinson, N., & Brown, P. (2011). New insights into the relationship between dopamine, beta  
719 oscillations and motor function. *Trends Neurosci*, 34(12), 611-618.  
720 doi:10.1016/j.tins.2011.09.003
- 721 Joundi, R. A., Brittain, J. S., Green, A. L., Aziz, T. Z., Brown, P., & Jenkinson, N. (2013). Persistent  
722 suppression of subthalamic beta-band activity during rhythmic finger tapping in Parkinson's  
723 disease. *Clin Neurophysiol*, 124(3), 565-573. doi:10.1016/j.clinph.2012.07.029
- 724 Kishore, A., Joseph, T., Velayudhan, B., Popa, T., & Meunier, S. (2012). Early, severe and bilateral loss  
725 of LTP and LTD-like plasticity in motor cortex (M1) in de novo Parkinson's disease. *Clin*  
726 *Neurophysiol*, 123(4), 822-828. doi:10.1016/j.clinph.2011.06.034
- 727 Klimesch, W., Doppelmayr, M., & Hanslmayr, S. (2006). Upper alpha ERD and absolute power: their  
728 meaning for memory performance. *Prog Brain Res*, 159, 151-165. doi:10.1016/S0079-  
729 6123(06)59010-7

- 730 Klimesch, W., Sauseng, P., & Gerloff, C. (2003). Enhancing cognitive performance with repetitive  
731 transcranial magnetic stimulation at human individual alpha frequency. *Eur J Neurosci*, *17*(5),  
732 1129-1133.
- 733 Knoke, D., Taylor, A. E., & Saint-Cyr, J. A. (1998). The differential effects of cueing on recall in  
734 Parkinson's disease and normal subjects. *Brain Cogn*, *38*(2), 261-274.  
735 doi:10.1006/brcg.1998.1042
- 736 Lago-Rodriguez, A., Ponzio, V., Jenkinson, N., Benitez-Rivero, S., Del-Olmo, M. F., Hu, M., . . . Cheeran,  
737 B. (2016). Paradoxical facilitation after depotentiation protocol can precede dyskinesia onset  
738 in early Parkinson's disease. *Exp Brain Res*, *234*(12), 3659-3667. doi:10.1007/s00221-016-  
739 4759-5
- 740 Lalo, E., Thobois, S., Sharott, A., Polo, G., Mertens, P., Pogosyan, A., & Brown, P. (2008). Patterns of  
741 bidirectional communication between cortex and basal ganglia during movement in patients  
742 with Parkinson disease. *J Neurosci*, *28*(12), 3008-3016. doi:10.1523/JNEUROSCI.5295-  
743 07.2008
- 744 Litvak, V., Jha, A., Eusebio, A., Oostenveld, R., Foltynie, T., Limousin, P., . . . Brown, P. (2011). Resting  
745 oscillatory cortico-subthalamic connectivity in patients with Parkinson's disease. *Brain*,  
746 *134*(Pt 2), 359-374. doi:10.1093/brain/awq332
- 747 McFarland, D. J., Miner, L. A., Vaughan, T. M., & Wolpaw, J. R. (2000). Mu and beta rhythm  
748 topographies during motor imagery and actual movements. *Brain Topogr*, *12*(3), 177-186.
- 749 Meconi, F., Anderl-Straub, S., Raum, H., Landgrebe, M., Langguth, B., Bauml, K. T., & Hanslmayr, S.  
750 (2016). Aberrant prefrontal beta oscillations predict episodic memory encoding deficits in  
751 schizophrenia. *Neuroimage Clin*, *12*, 499-505. doi:10.1016/j.nicl.2016.08.017
- 752 Meeuwissen, E. B., Takashima, A., Fernandez, G., & Jensen, O. (2011). Evidence for human fronto-  
753 central gamma activity during long-term memory encoding of word sequences. *PLoS ONE*,  
754 *6*(6), e21356. doi:10.1371/journal.pone.0021356
- 755 Miller, K. J., Schalk, G., Fetz, E. E., den Nijs, M., Ojemann, J. G., & Rao, R. P. (2010). Cortical activity  
756 during motor execution, motor imagery, and imagery-based online feedback. *Proc Natl Acad  
757 Sci U S A*, *107*(9), 4430-4435. doi:10.1073/pnas.0913697107
- 758 Moisello, C., Blanco, D., Lin, J., Panday, P., Kelly, S. P., Quartarone, A., . . . Ghilardi, M. F. (2015).  
759 Practice changes beta power at rest and its modulation during movement in healthy subjects  
760 but not in patients with Parkinson's disease. *Brain Behav*, *5*(10), e00374.  
761 doi:10.1002/brb3.374
- 762 Nelson, A. B., Moisello, C., Lin, J., Panday, P., Ricci, S., Canessa, A., . . . Ghilardi, M. F. (2017). Beta  
763 Oscillatory Changes and Retention of Motor Skills during Practice in Healthy Subjects and in  
764 Patients with Parkinson's Disease. *Front Hum Neurosci*, *11*, 104.  
765 doi:10.3389/fnhum.2017.00104
- 766 Obeso, I., Wilkinson, L., Casabona, E., Bringas, M. L., Alvarez, M., Alvarez, L., . . . Jahanshahi, M.  
767 (2011). Deficits in inhibitory control and conflict resolution on cognitive and motor tasks in  
768 Parkinson's disease. *Exp Brain Res*, *212*(3), 371-384. doi:10.1007/s00221-011-2736-6
- 769 Oostenveld, R., Fries, P., Maris, E., & Schoffelen, J. M. (2011). FieldTrip: Open source software for  
770 advanced analysis of MEG, EEG, and invasive electrophysiological data. *Comput Intell  
771 Neurosci*, *2011*, 156869. doi:10.1155/2011/156869
- 772 Otten, L. J., Henson, R. N., & Rugg, M. D. (2001). Depth of processing effects on neural correlates of  
773 memory encoding: relationship between findings from across- and within-task comparisons.  
774 *Brain*, *124*(Pt 2), 399-412.
- 775 Otten, L. J., & Rugg, M. D. (2001). Task-dependency of the neural correlates of episodic encoding as  
776 measured by fMRI. *Cereb Cortex*, *11*(12), 1150-1160.
- 777 Patterson, K., Nestor, P. J., & Rogers, T. T. (2007). Where do you know what you know? The  
778 representation of semantic knowledge in the human brain. *Nat Rev Neurosci*, *8*(12), 976-  
779 987. doi:10.1038/nrn2277

- 780 Pfurtscheller, G., & Lopes da Silva, F. H. (1999). Event-related EEG/MEG synchronization and  
781 desynchronization: basic principles. *Clin Neurophysiol*, *110*(11), 1842-1857.
- 782 Podvalny, E., Noy, N., Harel, M., Bickel, S., Chechik, G., Schroeder, C. E., . . . Malach, R. (2015). A  
783 unifying principle underlying the extracellular field potential spectral responses in the  
784 human cortex. *J Neurophysiol*, *114*(1), 505-519. doi:10.1152/jn.00943.2014
- 785 Raskin, S. A., Borod, J. C., & Tweedy, J. (1990). Neuropsychological aspects of Parkinson's disease.  
786 *Neuropsychol Rev*, *1*(3), 185-221.
- 787 Ray, N. J., Jenkinson, N., Wang, S., Holland, P., Brittain, J. S., Joint, C., . . . Aziz, T. (2008). Local field  
788 potential beta activity in the subthalamic nucleus of patients with Parkinson's disease is  
789 associated with improvements in bradykinesia after dopamine and deep brain stimulation.  
790 *Exp Neurol*, *213*(1), 108-113. doi:10.1016/j.expneurol.2008.05.008
- 791 Sederberg, P. B., Kahana, M. J., Howard, M. W., Donner, E. J., & Madsen, J. R. (2003). Theta and  
792 gamma oscillations during encoding predict subsequent recall. *J Neurosci*, *23*(34), 10809-  
793 10814.
- 794 Sederberg, P. B., Schulze-Bonhage, A., Madsen, J. R., Bromfield, E. B., McCarthy, D. C., Brandt, A., . . .  
795 Kahana, M. J. (2007). Hippocampal and neocortical gamma oscillations predict memory  
796 formation in humans. *Cereb Cortex*, *17*(5), 1190-1196. doi:10.1093/cercor/bhl030
- 797 Shing, Y. L., Werkle-Bergner, M., Brehmer, Y., Muller, V., Li, S. C., & Lindenberger, U. (2010). Episodic  
798 memory across the lifespan: the contributions of associative and strategic components.  
799 *Neurosci Biobehav Rev*, *34*(7), 1080-1091. doi:10.1016/j.neubiorev.2009.11.002
- 800 Spitzer, B., & Haegens, S. (2017). Beyond the Status Quo: A Role for Beta Oscillations in Endogenous  
801 Content (Re)Activation. *eNeuro*, *4*(4). doi:10.1523/ENEURO.0170-17.2017
- 802 Spitzer, B., Hanslmayr, S., Opitz, B., Mecklinger, A., & Bauml, K. H. (2009). Oscillatory correlates of  
803 retrieval-induced forgetting in recognition memory. *J Cogn Neurosci*, *21*(5), 976-990.  
804 doi:10.1162/jocn.2009.21072
- 805 Suppa, A., Marsili, L., Belvisi, D., Conte, A., Iezzi, E., Modugno, N., . . . Berardelli, A. (2011). Lack of  
806 LTP-like plasticity in primary motor cortex in Parkinson's disease. *Exp Neurol*, *227*(2), 296-  
807 301. doi:10.1016/j.expneurol.2010.11.020
- 808 Swann, N., Poizner, H., Houser, M., Gould, S., Greenhouse, I., Cai, W., . . . Aron, A. R. (2011). Deep  
809 brain stimulation of the subthalamic nucleus alters the cortical profile of response inhibition  
810 in the beta frequency band: a scalp EEG study in Parkinson's disease. *J Neurosci*, *31*(15),  
811 5721-5729. doi:10.1523/JNEUROSCI.6135-10.2011
- 812 10.1523/JNEUROSCI.6135-10.2011
- 813 Swann, N., Tandon, N., Canolty, R., Ellmore, T. M., McEvoy, L. K., Dreyer, S., . . . Aron, A. R. (2009).  
814 Intracranial EEG reveals a time- and frequency-specific role for the right inferior frontal gyrus  
815 and primary motor cortex in stopping initiated responses. *J Neurosci*, *29*(40), 12675-12685.  
816 doi:10.1523/JNEUROSCI.3359-09.2009
- 817 Voytek, B., Kramer, M. A., Case, J., Lepage, K. Q., Tempesta, Z. R., Knight, R. T., & Gazzaley, A. (2015).  
818 Age-Related Changes in 1/f Neural Electrophysiological Noise. *J Neurosci*, *35*(38), 13257-  
819 13265. doi:10.1523/JNEUROSCI.2332-14.2015
- 820 Zakzanis, K. K., & Freedman, M. (1999). A neuropsychological comparison of demented and  
821 nondemented patients with Parkinson's disease. *Appl Neuropsychol*, *6*(3), 129-146.  
822 doi:10.1207/s15324826an0603\_1
- 823 Zgaljardic, D. J., Borod, J. C., Foldi, N. S., & Mattis, P. (2003). A review of the cognitive and behavioral  
824 sequelae of Parkinson's disease: relationship to frontostriatal circuitry. *Cogn Behav Neurol*,  
825 *16*(4), 193-210.
- 826 Zion-Golumbic, E., Kutas, M., & Bentin, S. (2010). Neural dynamics associated with semantic and  
827 episodic memory for faces: evidence from multiple frequency bands. *J Cogn Neurosci*, *22*(2),  
828 263-277. doi:10.1162/jocn.2009.21251

## 830 **Figure legends**

831 **Figure 1. Memory performance.** A) Memory performance during encoding conditions  
832 illustrating greater memory strength during deep-semantic encoding for healthy controls (N =  
833 31) compared to Parkinson's disease (PD) participants (N = 28). Error bars denote standard  
834 error of the mean. \*  $P < 0.05$ . B) Correlation between deep-semantic encoding memory  
835 performance and disease duration for PD participants ( $P = 0.002$ ).

836 **Figure 2. Event related desynchronization.** Average beta (12 – 20 Hz) event related  
837 desynchronization (ERD) for electrodes in significant and/or largest cluster identified during  
838 cluster-based statistical analysis. Top row: between group differences during deep-semantic  
839 encoding of remembered words; middle row: between group differences during shallow-non-  
840 semantic encoding of remembered words; bottom row: differences within healthy participants  
841 between deep-semantic and shallow-non-semantic encoding of remembered words. Grey  
842 dashed squares indicate time window used in statistical analysis to identify significant  
843 electrode clusters over 12 – 20 Hz. Time course of beta ERD averaged over electrodes  
844 contributing to significant and/or largest cluster during encoding of subsequently successfully  
845 remembered words for controls (blue, N = 30) compared to Parkinson's disease (PD)  
846 participants (red, N = 26) in the deep-semantic encoding (A) and shallow-non-semantic  
847 encoding (C) conditions. A power decrease is denoted with negative values. Only deep-  
848 semantic encoding showed a significant difference between groups (electrodes contributing to  
849 significant cluster black in panel B). Topographical maps show the location of the ERD  
850 differences between groups in deep-semantic (B) and shallow-non-semantic (D) encoding,  
851 with colder colours indicating significantly greater ERD in controls compared to PD  
852 participants. Cluster shown for shallow-non-semantic encoding in C and D did not reach  
853 significance. E) Time course of beta ERD averaged over electrodes contributing to significant

854 cluster during encoding of subsequently successfully remembered words for deep-semantic  
855 (green) compared to shallow-non-semantic encoding (magenta) in controls. A power decrease  
856 is denoted with negative values. Only controls showed a significant difference between  
857 encoding conditions (electrodes contributing to significant cluster black in F). Topographical  
858 map in F shows the location of ERD differences between encoding conditions, with colder  
859 colours indicating significantly greater ERD in deep-semantic compared to shallow-non-  
860 semantic encoding. No cluster identified between encoding conditions for PD patients.

861 **Figure 3. Correlations in Parkinson's disease patients.** A) Correlation between deep-  
862 semantic encoding memory performance and maximum beta ERD over left frontal electrodes  
863 for PD participants ( $N = 26$ ,  $P = 0.008$ ,  $R^2 = 0.256$ ). B) Correlation between maximum beta  
864 ERD over left frontal electrodes and disease duration for PD participants ( $N = 26$ ,  $P = 0.007$ ).

865 **Figure 4. Subsequent memory effects.** Average beta (12 – 20 Hz) event related  
866 desynchronization (ERD) for electrodes in significant and/or largest cluster identified during  
867 cluster-based statistical analysis. Top row: differences within healthy participants between  
868 remembered and forgotten words during deep-semantic encoding; middle row: differences  
869 within PD patients between remembered and forgotten words during deep-semantic  
870 encoding; bottom row: differences within healthy participants between remembered and  
871 forgotten words during shallow-non-semantic encoding. Grey dashed squares indicate time  
872 window used in statistical analysis to identify significant electrode clusters over 12 – 20 Hz.  
873 Time course of beta ERD averaged over electrodes contributing to significant and/or largest  
874 cluster during high confidence hit (HH, cyan) compared to miss (M, yellow) trials in deep-  
875 semantic encoding for controls (A,  $N = 30$ ) and PD participants (C,  $N = 26$ ). Both groups  
876 demonstrated greater ERD during encoding of subsequently remembered (HH) compared to  
877 forgotten (M) words, but only the cluster in controls reached significance (electrodes  
878 contributing to significant cluster black in B). Topographical maps show the location of the

879 ERD differences between words in deep-semantic encoding for controls (B) and PD patients  
880 (D), with colder colours indicating greater ERD for remembered compared to forgotten  
881 words. Time course (E) and location (F) of beta ERD averaged over electrodes contributing  
882 to largest, non-significant cluster during high confidence hit (HH, cyan) compared to miss  
883 (M, yellow) trials in shallow-non-semantic encoding for controls (N = 30). No cluster  
884 identified between remembered and forgotten words in shallow-non-semantic encoding for  
885 PD patients.

886 **Figure 5. Three stages of memory task.** The letters in brackets indicated to participants  
887 which button on the keyboard corresponded to which response. In the final screen for a  
888 recognition trial participants saw assigned responses (i.e. recollection, very familiar etc.)  
889 rather than R1 – R6 which are shown here due to space constraints.

890 **Figure 6. Receiver operating characteristic curves.** ROC curves for a representative  
891 control (A) and Parkinson's disease participant (B) in deep-semantic and shallow-non-  
892 semantic encoding conditions. The false alarm rate is cumulative. The responses given on the  
893 6-point rating scale are grouped into the following conditions: high confidence hit (HH); low  
894 confidence hit (LH); miss (M).

895



**A**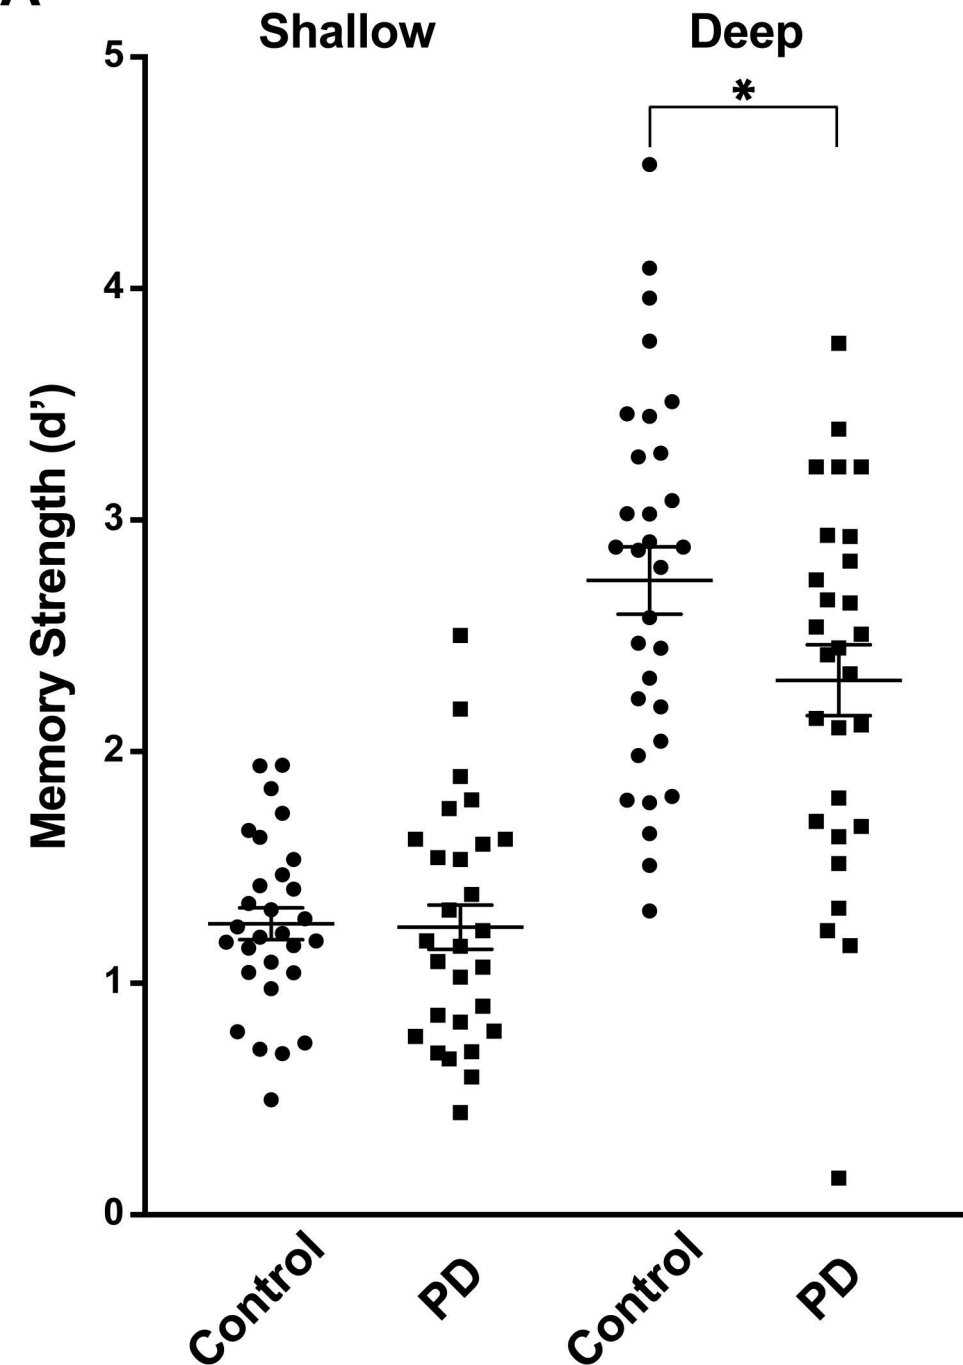**B**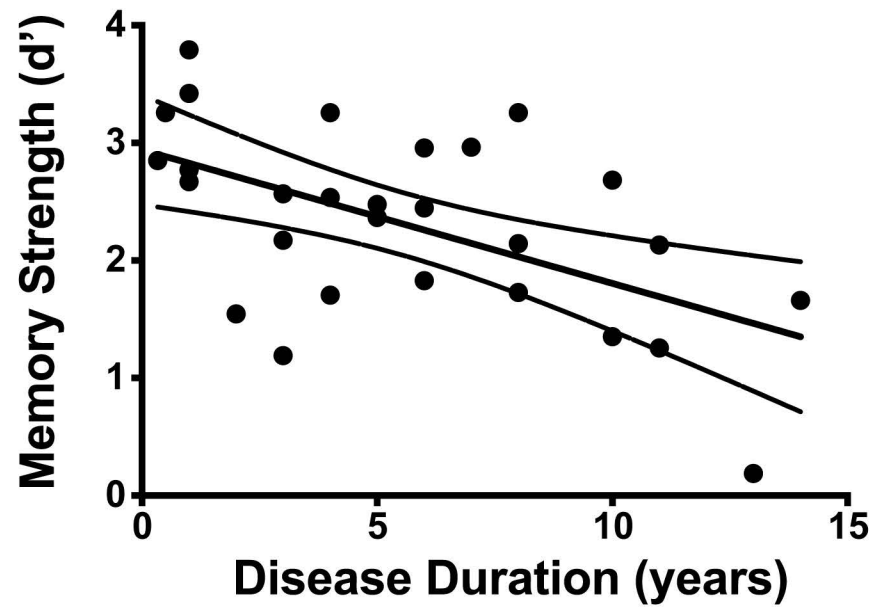

**A**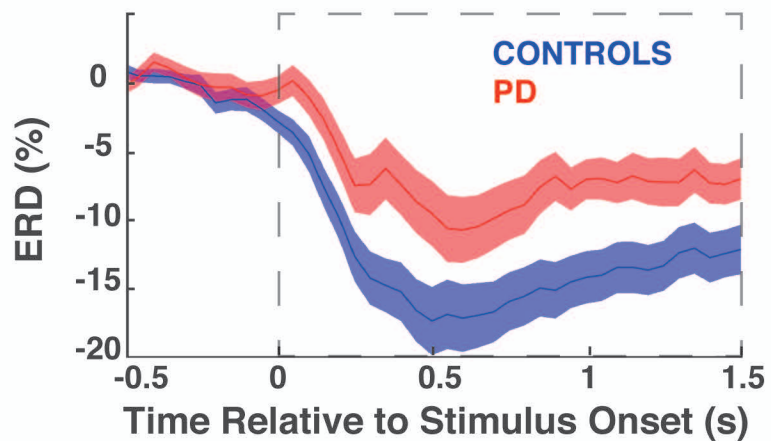**B**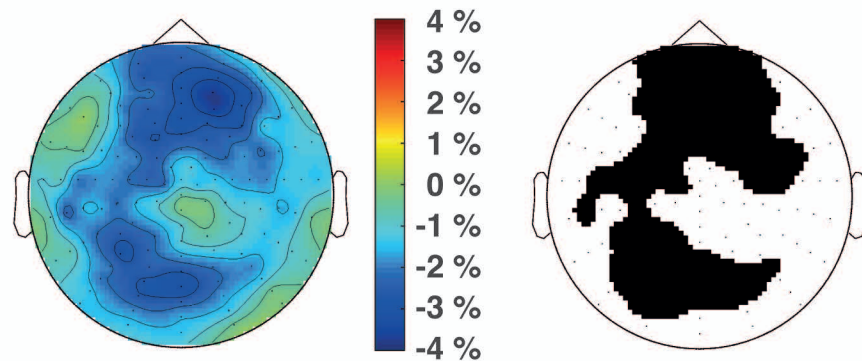**C**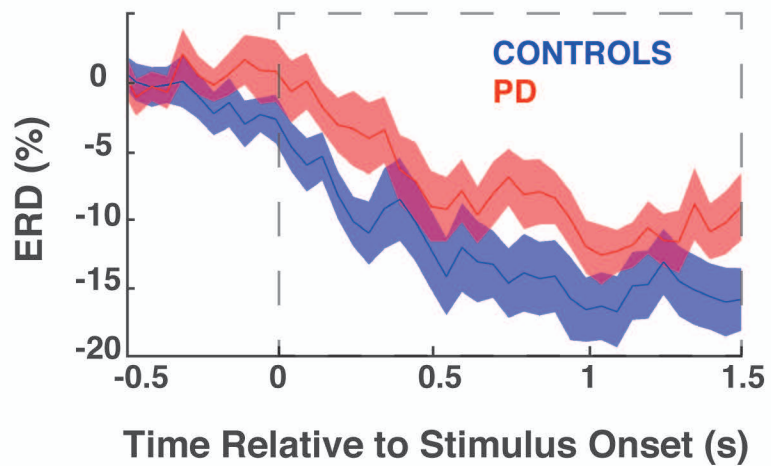**D**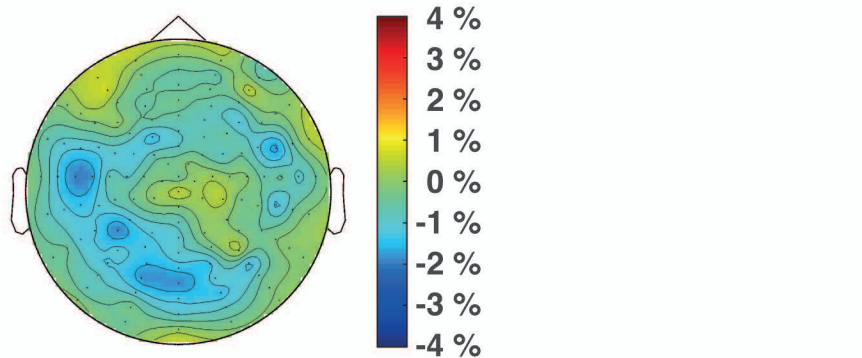**E**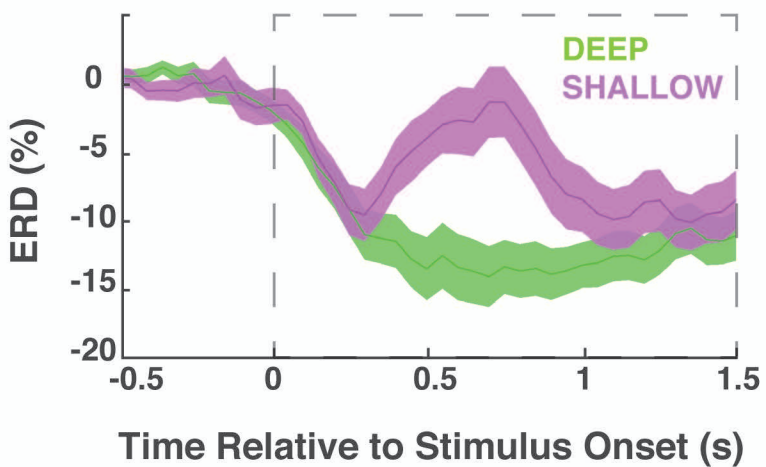**F**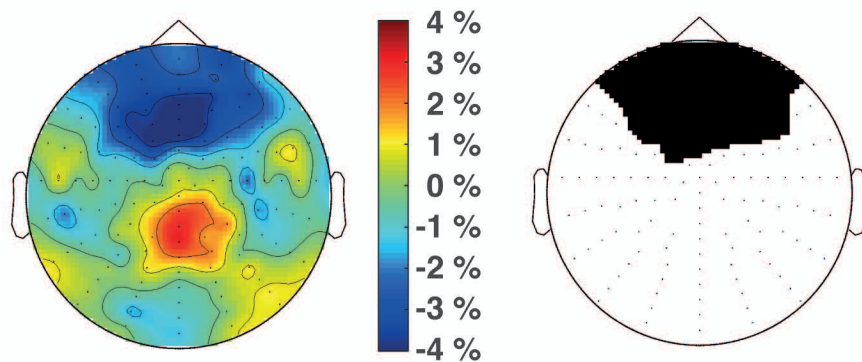

**A**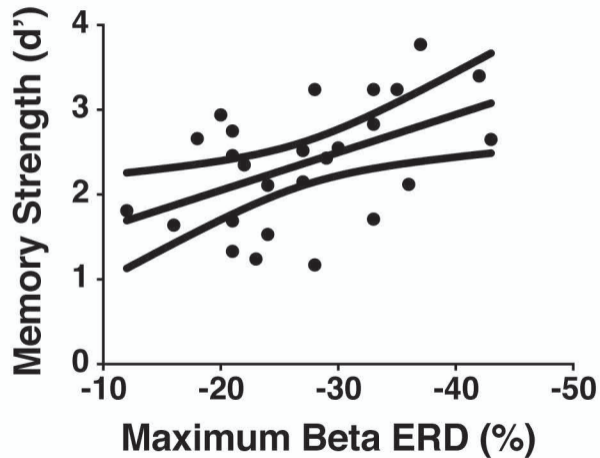**B**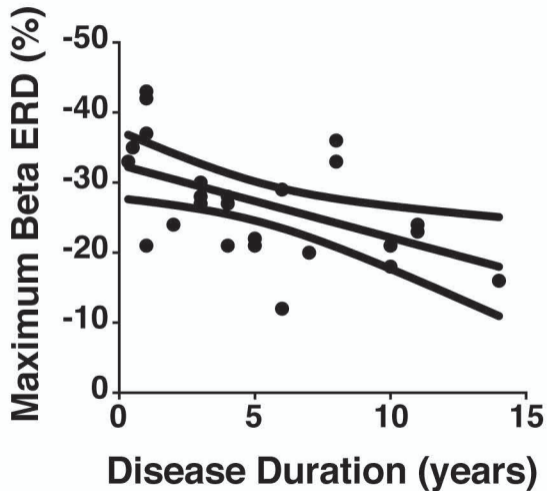

**A**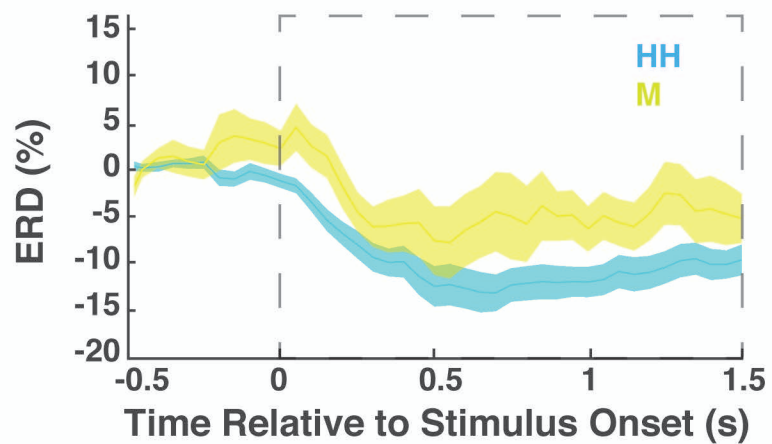**B**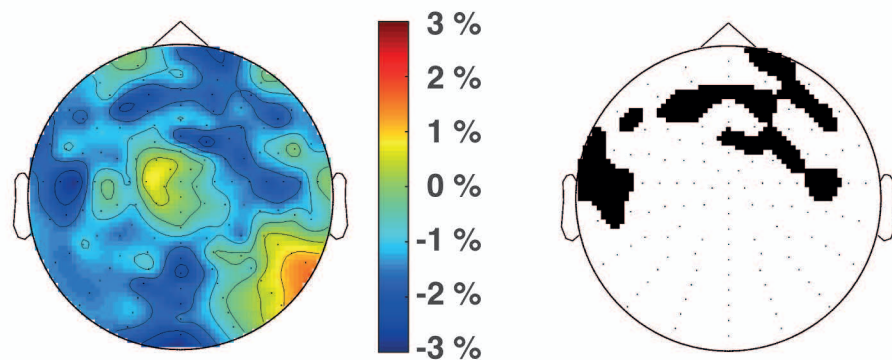**C**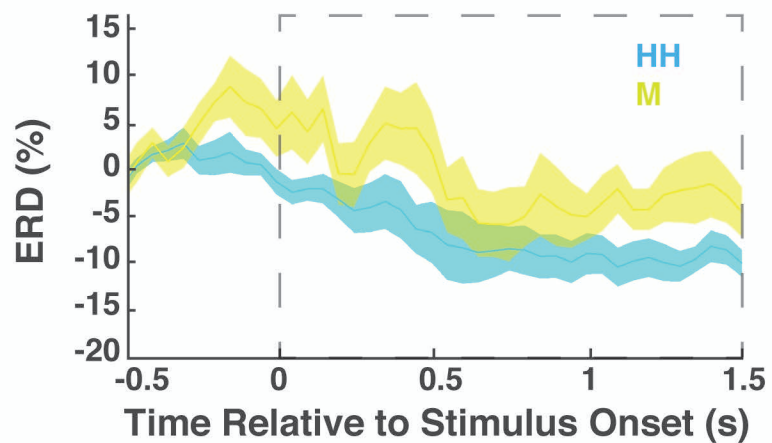**D**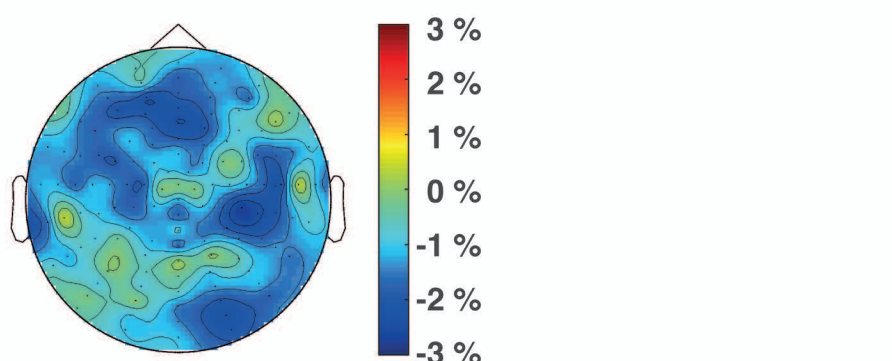**E**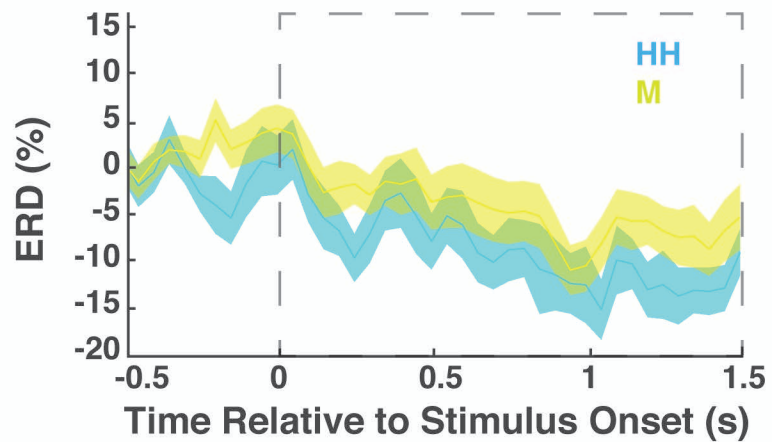**F**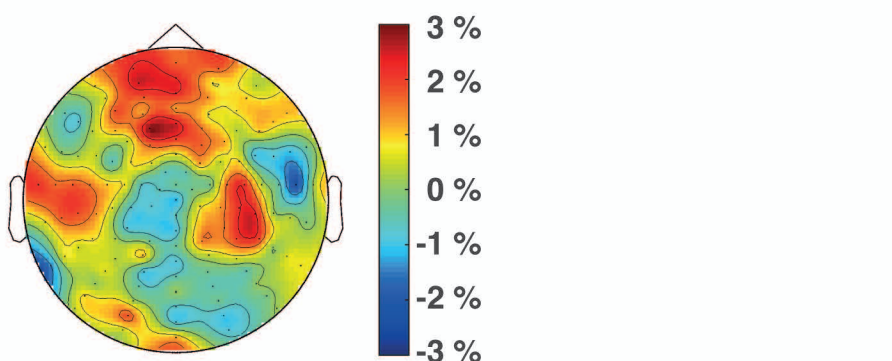

## Encoding

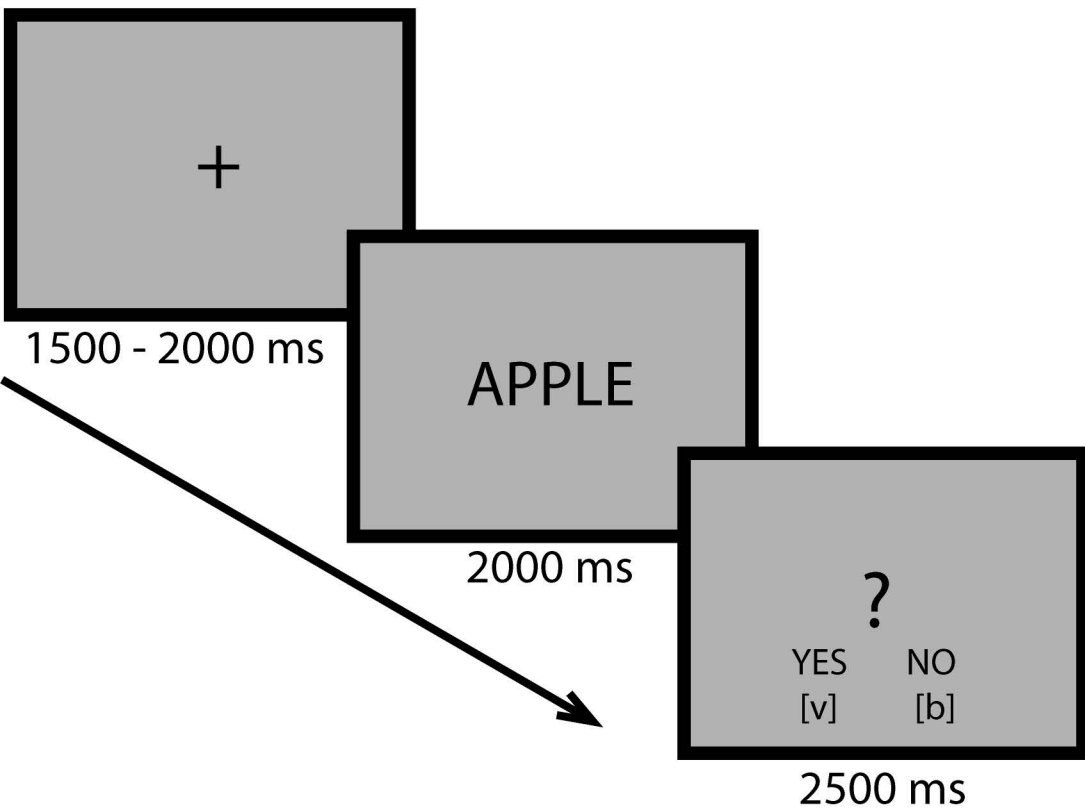

## DISTRACTOR TASK

## Recognition

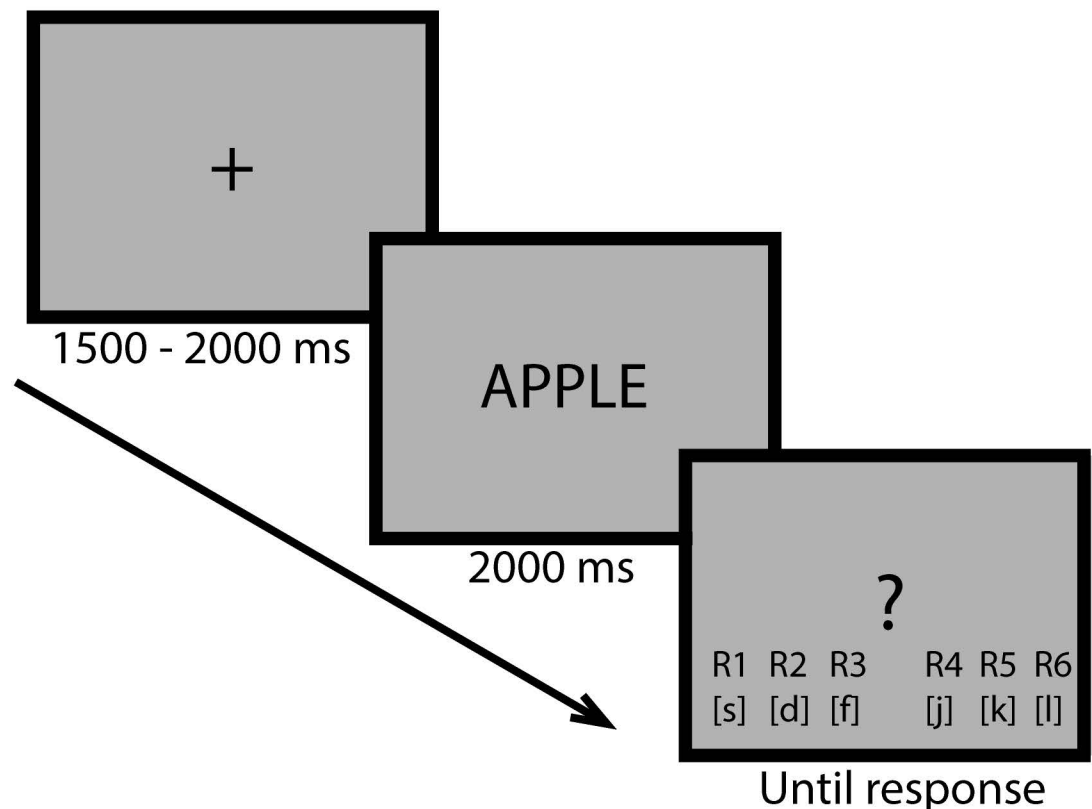

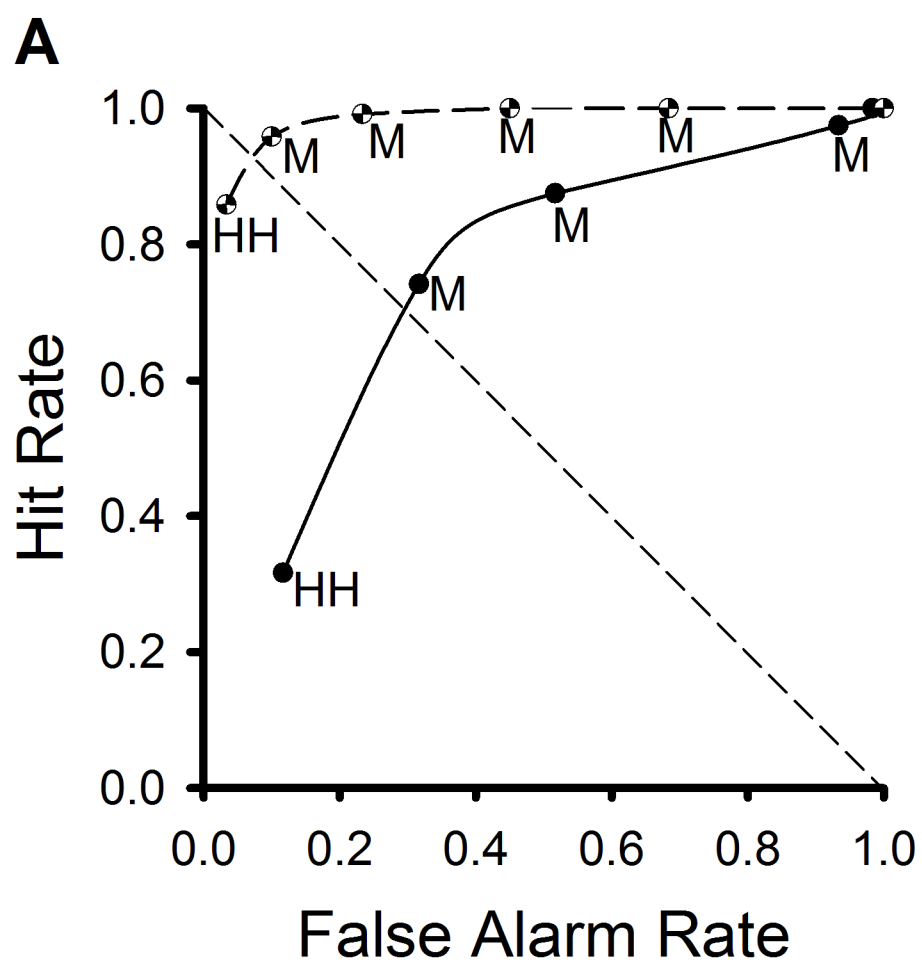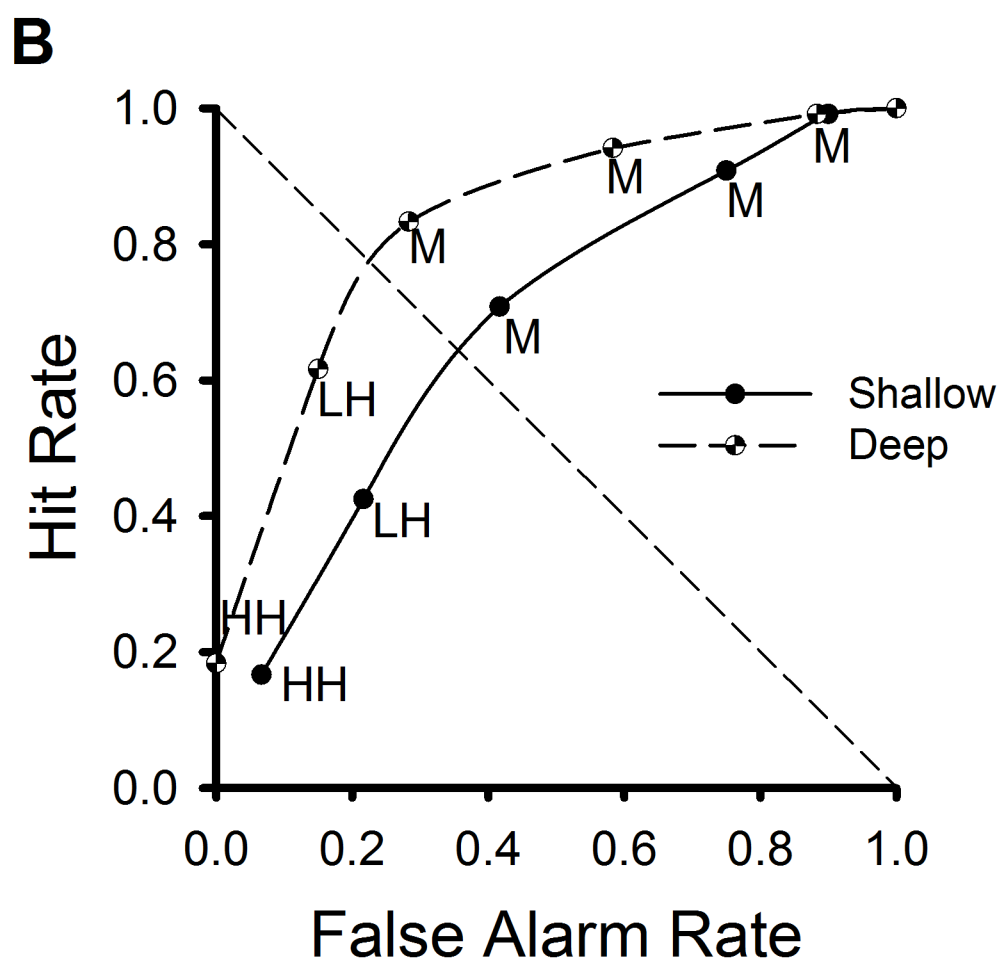

Source: http://biorxiv.org/content/10.1101/667550v1.full.pdf
